# Supplementary material for: Response to Nodal morphogen gradient is determined by the kinetics of target gene induction
Source: eLife. 2015 Apr 14;4:e05042. doi: 10.7554/eLife.05042 (PMC4395910; doi:10.7554/eLife.05042)
Supplement: Figure 5—source data 1. — Listed are all the genes and target sequences included in the probeset. DOI: http://dx.doi.org/10.7554/eLife.05042.017 [file elife05042s002.xlsx]

## Sheet: Definitions
	nCounter™ CodeSet Design Report - Definitions
	Section 1: Customer Order Info
	[CUSTOMER_INFO]
	Section 2: GX CodeSet summary
	[CODESET_SUMMARY]
	Organism
	CodeSet Name:	Name of CodeSet
	CodeSet Version:	Version of CodeSet
	CodeSet Quote Number:	Quote Number for CodeSet request
	CodeSet PO Number:	Purchase Order number for CodeSet
	CodeSet Part Number	Nanostring Part Number for this version of this CodeSet
	CodeSet Requested Probe Count:	Number of requested targets
	CodeSet Confirmed Probe Count:	Number of unique sequence targets
	CodeSet Discrepancy Notes:
	CodeSet Ideal Probe Count:	Number of probe pairs passing ideal quality cutoffs
	CodeSet cutoff Exceptions	Summary of non-ideal exceptions in this library:
		Xhyb = Cross hybridization potential
	Xhyb: Tm: GC: Structural:	Tm = out of range melting temp
	(some probes may be in multiple categories):	GC = GC content ratio out of range
		Structural = secondary structure interference potential
	Section 3: Transcript Variant Coverage columns:
	[TRANSCRIPT_VARIANT_DATA]
	1 - Target Accession:	Accession identifier for the mRNA target sequence.
	2 - Gene:	Common name for mRNA target sequence, as defined by RefSeq.
	3 - Number of Transcript Variants Covered:	Count of all known transcript variants that the probe will hit.
	4 - Number of Known Transcript Variants:	Count of all known transcript variants for this gene.
	5 - Accession for Non-Target TV's being hit:	List of accessions of transcript variants of requested target, excluding target accession.
	Section 4: Detailed probe information columns:
	[CODESET_DETAILS]
	1 - Customer Identifiers:	Default is RefSeq Gene name, otherwise specified by customer
	2 - Accession number:	Accession number of requested target sequence.
	3 - Target Region in accession:	Region in the target mRNA being probed.
	4 - Target Sequence:	Sequence of target region.
	5 - Tm of capture probe IF below or above cutoff:	For probes with a Tm out of range, calculated Tm's are posted.
	6 - Tm of reporter probe IF below or above cutoff	For probes with a Tm out of range, calculated Tm's are posted.
	7 - Exception Flags
	[ T ]	Tm out of range
	[ X ]	Cross hyb signal expected
	[ V ]	Variant Specific
	[ S ]	Structural issues (GC%, hairpins, poly-G etc)
	[ C ]	Custom Sequence
	8 - Gene:	Common name for mRNA target sequence, as defined by RefSeq.
	9 - Part Numbers:	NanoString part number for this probe pair.
	10 - Nanostring Internal Identifiers
	11 – Comments

## Sheet: Version History
	nCounter™ CodeSet Design Report - Revision History
	Version	Date	Reason For Changes
	1	2012-08-15	Initial Version
	2	2012-08-23	Replaced 14 probes

## Sheet: Design Data
	nCounter™ CodeSet Design Report - Data
	CUSTOMER INFORMATION
	Customer Name:	Julien Dubrulle
	Customer Institute:	Harvard
	CODESET SUMMARY
	CodeSet Name:	SchierJD
	CodeSet Report Version:	2
	CodeSet Design Report Date	8/23/12
	CodeSet Quote #:	SQ-04667
	CodeSet PO:
	CodeSet requested probe count:	329
	CodeSet confirmed probe count:	329
	CodeSet notes:	Rev2 8/23/12 (changes highlighted in yellow): * Removed 14 probes:znfl1, birc5a, sall4, zgc:85866, pttg1ipb, fsta, rarga, stra6, cki, vcana, tbl2, si:dkeyp-46h3.2, non-coding/coding (nc) & non-coding/coding (coding) * Added 14 probes: sox3, FoxH1, runx1, c1d, bmp2b, bmp2a, trim33, C1d_neighbor, linc-zgc:153426, linc-c6orf105, linc-hoxb8a, linc-slc6a4b, linc-zgc:193613, RAPGEF4a_neighbor * 12 targ…
	CodeSet Tier1 pass:	316
	CodeSet Probe Exceptions:	Xhyb	TM	GC	Structure
	Exception Count:	13	0	0	0
	ISOFORM COVERAGE
	Customer Name	Gene	Probe NSID	Other Isoforms Hit by Probe	# Hit
	apelin	apln	NM_001166124.2:2255	XM_002664418.1	2
	cdc42	cdc42	NM_200632.1:360	NM_001018120.1	2
	eng2a	eng2a	NM_131044.1:170	NM_001128823.1	2
	fzd10	fzd10	NM_130917.1:614	NM_131136.1	2
	hoxd9a	hoxd9a	NM_001128296.1:280	NM_131126.2	2
	jag2	jag2	NM_131862.1:4880	NM_131665.1	2
	tp73l	tp63	NM_152248.1:625	NM_152986.1;NM_152987.1	3
	vegfaa	vegfaa	NM_131408.3:28	NM_001110349.2	2
	CODESET DETAILS
	Customer Identifier	Accession	Targ Region	Target Sequence	Tm_CP	Tm_RP	Flags	Gene	PN(CP;RP)	NSID	Comments
1	adipor1a	NM_001002467.1	745-845	TATGCTGCACGAATCCCAGAGCGCTACTTCCCGGGCAAGTGTGATATTTGGTTTCACTCGCACCAGATATTTCACGTGCTAGTGGTGGCAGCGGCCTTCA	84	82		adipor1a	373701;273701	NM_001002467.1:745
2	tbr1b	NM_001115090.2	2535-2635	GGATACATCTCGTATAGGTTCCAGTTGTGATGACAAAAACGATACGACTGAATTGGAAGTAGCTGCTAATCCGTTGAAAAGCCCGCCAAAAAGAGTTCCT	79	82		tbr1	373745;273745	NM_001115090.2:2535
3	arl4l	NM_200318.2	315-415	GCCGTCCTTCCAGGCCCTGCACATTGTTATTCTCGGATTGGACTGTGCCGGTAAGACCACAGTGTTGTACAGACTACGCTTCAACGAGTTTGTGAACACC	83	81		arl4l	373812;273812	NM_200318.2:315
4	fam172a	NM_200418.1	940-1040	CACAGCTATGGCGGCTTGTCTTTCGTCAATTTGATGATTAACCGAGAAGCAGAAGTGAAGAGTCGTGTTCGTGCAGTGGCCATGACTGACTCTGTCCATA	78	84		fam172a	373813;273813	NM_200418.1:940
5	sox32	NM_131851.1	635-735	AACATCATCAAGTGGAAACGTGTTTCATGGTGGCGCGACTTCAATGAACTTGTCTAATGTGCATCTGCCACGGTCTGCTTACTCAGAGTCACTATTGTAT	80	79		sox32	328476;228476	NM_131851.1:635
6	efnb2b	NM_131808.1	140-240	ATACCCTCAGATCGGAGACAAAATGGACATTGTGTGTCCAAGAATCAAGCCAGGCTCCACTGAGCAGACGAACATTGAATACTTCCGGGTCTATCTTGTT	84	82	X	efnb2b	373656;273656	NM_131808.1:140	also targets XM_002660345 PREDICTED: Danio rerio ephrin-B2a-like (LOC100333671) @100%
7	paqr3	NM_200710.2	660-760	GGGATCTCCATTGGAATCATAGGCTGTTATGTTCCAGGAGTGTTCTACGCTTTCTACTGCAATAATTACTGGCGGCAGGTGTATCTGGTAACCGTTCTGG	80	80		paqr3a	373814;273814	NM_200710.2:660
8	chd	NM_130973.1	510-610	CGACTCTGGGAGGAAGGAGGTCGAGTCTCTGTTTGATTTCTTCCAGGAAAAAGATGACGATTTGCACAAATCCTACAACGACAGATCGTACATCAGCTCC	82	82		chd	328416;228416	NM_130973.1:510
9	slc15a4	NM_200957.1	1595-1695	GGATCGGCTCCTTTGTGGGATCCGGACTTCTAGCTATTGTCTCGCTCAAAGCCATCGGGTGGATGTCTTCGCATCAAGATTTCGGTAACATCAACGAGTG	81	80		zgc:63767	373815;273815	NM_200957.1:1595
10	appa	NM_131564.1	3245-3345	TCTGGTGTTTTCTGCACCGTCTGCTCTCACACTACTAAACGAGTGAAACACTGGTGTATTTGAGGGCTGAACGTGCGAGACTTCCTCCGTCAGTCGCGTC	81	83		appa	373792;273792	NM_131564.1:3245
11	ntl	NM_131162.1	10-110	TGTCAAAGCAACAGTATCCAACGGGATTTAGTAGGATCGTCGGACTTATCTCAAGCTTTATTTGATCGGAAATATGTCTGCCTCAAGTCCCGACCAGCGC	79	80		ntla	328435;228435	NM_131162.1:10
12	decr1	NM_001002444.1	740-840	TATGGCATGAGATTCAACGTTATTCAACCCGGACCTATCAAAACCAAGGGGGCTTTTAGCAGACTGGATCCGGCTGGTGTGTTTGAGAAGAAGATATTAG	81	81		zgc:92356	373700;273700	NM_001002444.1:740
13	foxc1a	NM_131728.2	70-170	CACCCGGTGCAATAGTCCGGTTTTGTAAATACGGTGGACTCTGTGGTGGATTCCCATTCCCAGATTCAGAGGAGGCGCATTTCAAGCAGGATTGTGTGTG	82	80		foxc1a	373794;273794	NM_131728.2:70
14	dusp6	NM_194380.1	2625-2725	GACGTTGGAAGGTTGAAGCAAGTAATGCTGATTTTTGTTGTGTGTGTGCAAGGATTTGAGGTCTGTGTTGACAAAGCAGGGAGAACTTTTTTGGGTCTCC	75	80		dusp6	330200;230200	NM_194380.1:2625
15	zgc:85812	NM_214817.1	695-795	TCGCCAGACAAAGGTTGAGATAGCTGATACTCAGCGTTTTGAGCAAGGATGACGATCTTACACGTCTGAAGAGAAAAACTGCTTCCACCCACTAAAAAGA	83	83		zgc:85812	373828;273828	NM_214817.1:695
16	sh2d5	NM_001014343.1	1200-1300	ACTTTGAAAGCCTTGCTGCTTTAATGGAGCACTACACAGAGTTCGGTGACGAGCTGGAATGTTCTCTGAGCTGCGCACGCGTCAACCACTGTTACGACTG	82	85		sh2d5	373716;273716	NM_001014343.1:1200
17	zdhhc18	NM_001077563.1	1765-1865	GGGCTCAAACGTGCAGCTCTTCACACCCATAAACCCATGCTGCGTCTGCCCAGTCCTCTCTACTCCCTCAGTGACAGTCCACTCATTCTTAGTGACGCTC	86	82		zdhhc18	373734;273734	NM_001077563.1:1765
18	isg15	XM_682249.3	535-635	AAAGGCAGACAGCTCGAGTCTGGCATGAAGTTGCAGGACTATGACATCACCTCATTGAGCACCATTCACATGACTCTCCGTCTACGAGGAGGATAATGAT	86	82		LOC558956	373868;273868	XM_682249.3:535
19	ndr2	NM_139133.1	107-207	GCTTGAGGAATATGTCACACCGCATGCATCTGCCCACGTACATGATGCATCTCTATCGGCATTACAAGATGAACCAGACGCGCATACCCGCGGAGAGCCT	85	85		ndr2	328370;228370	NM_139133.1:107
20	og9x	NM_173227.1	475-575	GTACTTTTCCAGCAACCAATCCCGATTTAAACCTAGAACAAAACCCAGAGGCCAACAAAAGCTTGCGTCATCATCAGCAAAGCCTTATTAGACAGGCTCT	79	83		og9x	328483;228483	NM_173227.1:475
21	pvrl3l	NM_001014304.1	275-375	GACAATGACTGCCCATTTTCTCAGGAATAACCCGATTCAGCTGGGACTGAATGTGAGAGTCCTGCTCATGCTCTCATTTGTGTCAGGGTTGGTATATGGC	84	81		zgc:113035	373715;273715	NM_001014304.1:275
22	ctpsb	NM_001003639.1	1718-1818	AATTATGCTCTATAACACTTTAGCAAGAGGAACACCTAGGTACTATTGCATAAAATGTGGTTATGTGGCTTGAGTGAGCAGGGAAGCTGTCATGGTACAA	79	84		zgc:100914	373670;273670	NM_001003639.1:1718
23	p4ha2	XM_001918446.1	252-352	CGCAGTATATTACCCACAGTGCCTTGACTCTGCACACACACAGAGATAATCACACTCTCCACATTCATCCATACGTGATGTCCGTGAGGGATTTCAGGCT	84	81	X	LOC100151456	373662;273662	XM_001918446.1:252	also targets p4ha2 NM_001007285.1 @100%
24	tp73l	NM_152248.1	625-725	ATTTCATGTGTAACTCCAGCTGTGTTGGCGGAATGAACAGGCGGCCAATTCTCATCATTGTCACATTGGAAACCAGAGATGGTCAGGTTTTGGGTCGACG	82	79		tp63	328478;228478	NM_152248.1:625
25	zgc:110712	NM_001017588.1	150-250	GAACGGTTTTGGGAGCTCAGGCAGCTCTTTGTCTTTTGGTGGGCAAAACTTCAGTAGCTCTTCAGGCTTCGGTGCTCGCATCTCCAGATCGGTGTCCACT	81	84		zgc:110712	373652;273652	NM_001017588.1:150
26	arg2	NM_199611.2	760-860	GTAGCTTTCTTACTAAAGGACCTGCAGAACAAGATGCCCAAAGTTCCCGGATTTTCCTGGATGAAGCCGTTCCTGTCTGCCAGAGATCTGGTGTACATTG	84	79		arg2	373808;273808	NM_199611.2:760
27	ndr1	NM_130966.1	390-490	GATGACGTCCAGCGAGCTGAACTTCGCATTCGGCTTCCGCATCTCAGGTCTGAGTTGGAGGTGGATATTTATCACGCATCTACACCGGAGTGTGAGAGAA	82	83		ndr1	328415;228415	NM_130966.1:390
28	tagln2	NM_201576.1	1055-1155	ATTGCTATTATTAACATTCCAGAGAAACGCACTCTGGTGCACACCATGGGAACAAAAAGCCTGTAAGGTAAATTTGGCTTCGCACAGTCAGGTGTTTGTC	81	78		tagln2	373816;273816	NM_201576.1:1055
29	lhx1a	NM_131216.1	1495-1595	CTGTATGAACTCCGCTACGAGGCGTCCCTCCACAAATCGGTTTAATCGGCGCTCTAAAAACAGCGATTGCGACACATTAACAGCGTCAGCTACCGTCAAA	83	82		lhx1a	328440;228440	NM_131216.1:1495
30	fscn1	NM_001076560.1	2090-2190	GTGAGCTATTGATGTATGCCTCCTGTTATAATGCCAGTCACAAGTACCTACCCTCTCGATCAGAGGGCGAAGGCAGTATTTACAGGTAAATGTATGAATG	79	82		zgc:153632	373731;273731	NM_001076560.1:2090
31	pard6gb	NM_212563.1	1305-1405	AGTCATCACTTTATAATACATGCAGACAACCTCTAGCCCTCCCAGAGACTCAGTCTTTCAGCCTGGGAAATCACACTCGACTTTGAACCTCACCAAACTT	84	81		pard6gb	373819;273819	NM_212563.1:1305
32	lhx1b	NM_131207.1	875-975	TATCAAAGTGAATACTATGGCCCGGGGTCAAACTATGACTACTTCCCTCAGGGTCCACCGTCATCCCAAGCCCATACTCCAGGTGATCTAGGATTCATGC	83	85		lhx1b	373773;273773	NM_131207.1:875
33	gsc	NM_131017.1	430-530	TGTCCGTGTATTCCTACAGGTTATGACAGCGCCGGCTCTGTGCTTATTTCTCCAGTCCCACATCAAATGATGTCGTACATGAACGTGGGCACCTTGTCCA	79	82		gsc	328420;228420	NM_131017.1:430
34	wnt8a	NM_130946.2	50-150	ACCTGAGCTTCTGTGAGTGACTCGTCAAAATGGATCATCTGTGCAGCAAGTGTTTGTGCTTTGCATCTCAAGAAGAAGGGAGGATCGAGCAATCACTGGT	82	82		wnt8a	328412;228412	NM_130946.2:50
35	rasgef1b	NM_199829.1	1385-1485	TGCTCACAGCAGCAGAGAGAAGATTGTTATCCCTTTCTTCAGCCTCCTAATTAAAGACATTTACTTCCTCAACGAAGGATGTGCCAACAGGCTCCCGAAC	81	83		rasgef1ba	373809;273809	NM_199829.1:1385
36	flh	NM_131055.1	0-100	GCTTTTTGGACTAAACAGACGCCATGCAGATTCCCGGAAGAGCTTACGAAACTTATGGACAATCAGCACGTCCTTTGCATCAGGACTATGCCACCTCTTC	82	82		flh	328425;228425	NM_131055.1:0
37	kirrel3l	NM_001099344.1	1510-1610	TGTCAGCACCTTGGTGGATGTACAATTTGGTCCGAGATTGCTCACAGAACCAAAACCGCAGATAGTGGACATTGGGATGGATGCTGCTTTCACTTGCTCA	83	83		kirrel3	373739;273739	NM_001099344.1:1510
38	wnt5a	NM_130937.1	520-620	TGCATATAGGCAGCCGAGAAACAGCTTTTACGTACGCCGTCAGCGCAGCGGGTGTTGTGAATGCTGTGAGTCGAGCGTGCCGTGAGGGTGAGCTTTCCAC	83	84		wnt5b	334984;234984	NM_130937.1:520
39	fgf8	NM_131281.2	505-605	CACCTCTTTGCGTTTTGCTACTATGCTCAGGTAACCATTCAGTCCCCGCCTAATTTTACACAGCATGTGAGTGAGCAAAGTAAGGTGACGGACCGGGTGA	79	82		fgf8a	328451;228451	NM_131281.2:505
40	zic2a	NM_131558.1	1670-1770	GAATGGTATGTTTAAGACTGTGCCATCCCAGGAGGACCCGATAAAGAAAAACAGGAGATCCATATACAGCTTGTACAGAACGAACGCTTGAATATTACGC	84	81		zic2a	373790;273790	NM_131558.1:1670
41	foxa2	NM_130949.1	755-855	GCAACGCTGGCAAAACTCTATCCGCCACTCGCTGTCTTTTAACGATTGTTTCCTGAAAGTTCCGCGCTCTCCGGATAAGCCGGGTAAAGGCTCGTTTTGG	79	83		foxa2	328413;228413	NM_130949.1:755
42	dlb	NM_130958.1	210-310	CTGCCTGCTGTCTGTGTCGCTGTTGCAGTTGGTGGCTTCGTCGGGTGTGTTTGAGTTGAAAGTTCACTCTTTCAGCACCACACGGCGCTTCTGCAGGAGG	83	83		dlb	373755;273755	NM_130958.1:210
43	efnb2a	NM_131023.1	25-125	ACTTTGGAGTTTTAGTGATCGCGTGCAAGGTGAACCTGTCCCGCGCGCTCATCCTGGACTCCATATACTGGAACACCACGAACACCAAGTTTGTGCCGGG	82	83		efnb2a	328421;228421	NM_131023.1:25
44	acvr1b	NM_130990.1	850-950	ACCATGAGCATGGCTCATTATTTGACTATCTCAACCACTACTCCGTCACAATCGAGGGGATGATCAAGTTATCGCTTTCAGCCGCCAGCGGTCTGGCACA	81	82		acvr1b	328418;228418	NM_130990.1:850
45	fgf3	NM_131291.1	324-424	GGACTGTTTTCGGGAAGATACCTGGCTATGAATGAGAAAGGACGTCTCTATGCTTCAGAAGTCTTCAACCGAGAGTGTGAGTTTCTGGAGCGCATTCATG	82	79	X	fgf3	328385;228385	NM_131291.1:324	also may target PREDICTED: Danio rerio fibroblast growth factor 3-like (XM_002662915 XM_002662921 XM_002662917 >98% similar
46	oep	NM_131092.1	220-320	TGAATAAATTTAACGAAATGAACACGCAAACGCCGCAACGTCAACACCGCAACGCCGAGGCAGCGTTACCGTTCGTTGGACTGACCGGAGTTGCCAAACA	82	85		oep	328363;228363	NM_131092.1:220
47	foxa	NM_131282.1	811-911	ATCACCTACAAGTGATGCTACAAAACAGAGTTCAACAACAGTGAGCTACGCCAACACCAAACCAGCTTCTCCCTCCCATCTCAATCCCTCACATACTTTA	82	81		foxa	335005;235005	NM_131282.1:811
48	wnt11	NM_001144804.1	1415-1515	TACTGTGGTAAAACTTCACGCGTTGATGGCCTGCCCGGATCGGTTTTGTTTTGGTCAGATGAATTTCACGAGCTGGACGTGATGGACATCAGATTAGTTC	79	79		wnt11	328407;228407	NM_001144804.1:1415
49	pcdh8	NM_131209.1	1250-1350	CTTCCGATAAAGATTCGGGGCCGAATGGTTATGTTCGGACGAGTCTTGAAGGACACGAGCATTTTAAACTACAGCAAGCCTACAGCGACACGTTTATGAT	78	81		pcdh8	328437;228437	NM_131209.1:1250
50	lft2	NM_130961.1	740-840	GCTTTACACTTTAGACCTCGATGAATATGGATCCCAAGGCAACTGTAACTCCAGCCCAAACAGCAGCAAATGTTGTCGGGAGGAGCATTTCATCAACTTC	81	83		lft2	334997;234997	NM_130961.1:740
51	pfkfb3	NM_213397.1	2155-2255	CTGATGGTAAGAATAAGCCCTGTGATTTCGAGAAGACGACGCTAAAAAACAGACCAAAGATCACCCACGGATGTTAGTGGGCTGATTTGTGTCCATTCTG	82	82		pfkfb3	373826;273826	NM_213397.1:2155
52	ets2	NM_001023580.1	85-185	AAACACTGCAGCGCAAGCACCGCGGATTATTGAGTTATTCCTGTCAGAATTCAACAGGTCTCAGTGTGTAAAATGGAGTCGCTTTTACCTGGATTCAGAA	81	78		zgc:92106	373720;273720	NM_001023580.1:85
53	dkk1	NM_131003.1	370-470	AATTCAGCAGCTTGGCATGGAAGAGTTCGTGTCCATCGCCCATGAAAACTCTACTGCTCTCATGCCGAAAGTTTCGACTCAAGGATCACCACAAAACCAG	83	82		dkk1	328419;228419	NM_131003.1:370
54	bon	XM_001923399.1	763-863	CAGTTACACACAGCAGTACCCAAAGGAACACGAACAGTTCACACATTCAGCAAACCACGCTAAATCAACAATGAAGCAGTTTTTGGTGGAGTATGACAAC	83	79	X	LOC100150870	373663;273663	XM_001923399.1:763	also targets bon (NM_130940.2) & PREDICTED: Danio rerio hypothetical protein LOC100330956 (XM_002664632.1) @>98%
55	gata5	NM_131235.2	1360-1460	CGCAGCTTCTCCATATGCAGGCCAAACCGTTGTCTCGGTCACACAGGCATCGACACAGTTGGATAGTGCCAGTTCTGCCCATGTGGACATCAAATATGAA	82	82		gata5	328443;228443	NM_131235.2:1360
56	nog1	NM_130983.2	70-170	GCACGGAATTACGCACGGATAAATCCCGCGTTTAATCTCTGATCTCGCTTTTGGATGAAGATTTCAAAAGGATGGATTTCCCGCGGTGTTTGCTGTCCGC	78	78		nog1	328417;228417	NM_130983.2:70
57	fzd8b	NM_131553.1	1450-1550	TGTCCATGTTTCGCATACGGAGCGTCATTAAGCAAGGAGGAACGAAAACGGACAAACTCGAGAGGCTGATGGTTCGCATCGGGGTGTTTACAGTACTCTA	81	82		fzd8b	328469;228469	NM_131553.1:1450
58	pitx2a	NM_130975.1	360-460	TCGCTTGTCTTATCCATGACCTCTATGAAGGATCCGTTGAGTTTGGACCACCATCATCACAATCACCACGTTACCGGGAGTAAACACGCGCCGCTTTCGA	78	82		pitx2	335000;235000	NM_130975.1:360
59	lft1	NM_130960.1	295-395	AATGCAGACATATCTGGTGAATTCGTATATTCTGACACGACACGTCAGCGTGTGGTCTTTGAAATGACATCAAGAATCCCCGAGAACAGTGAAGTGACCA	79	83		lft1	328414;228414	NM_130960.1:295
60	irx3a	NM_131267.1	95-195	GCGCACCAAGAGGGCGATTCGCCGCTTTTTGTGACTCCAGTAGACTTTCTCCACAACAATGTCTTTCCCACAGCTGGGATATCAGTACATCCGACCCATA	81	83		irx3a	328448;228448	NM_131267.1:95
61	dusp4	XM_001923910.1	2015-2115	GTACACAGACGCTTTTGCTCAAATCGGCTCCATCGCCTTTCAGTCTGCAATACCAGTCCACTCTTGTCAGATCAGAGCAATAACCTGATTCTCCTTCCTC	79	81		LOC100150518	373866;273866	XM_001923910.1:2015
	znfl1	XM_001337249.2	1941-2041	GTACATGAGGACAATAATCAAGTTTTGTCACCTCTGAAGAGGGGCCATAGTTTAGAGCCCAGTAAATGGGTAAAGACACGACAACCTCAGAAACTACCAC	82	85	X	LOC799877	373649;273649	XM_001337249.2:1941	probe removed
62	cited3	NM_200078.1	930-1030	TTAGCTGCTGAGACAGGACTGTTTGGACGCTTCGAGGCGGGATTTGATTATCAATATGGTTATTTTTGGGACCACCATCACCAGAACCAGAGGTGGCCAA	83	82		cited3	373811;273811	NM_200078.1:930
63	Hes6	NM_194400.2	450-550	CCTCGAATGTATGCCTCTGAACGACGAGGAGCGCTTTCAGGACATTCTGTCAGACCTCATTTCGGACTCTAACAACTCTGGCACTTGGCCTGGCGAGGCG	83	85		hes6	373803;273803	NM_194400.2:450
64	LOC557995	XM_681158.4	1600-1700	TAGCCGGCGGAGTGACTTTATCTGTCATTGTGTCTCCAGTGGTTGCTGCTGTTACTGTTGGAATAGGAGTGCCCATCATGTTGGCATATGTCTATGGTGT	82	79		LOC557995	373867;273867	XM_681158.4:1600
65	Cyp26a1	NM_131146.2	840-940	CAATGAAAACGAGCAGAAATACAAAGACGCTCTTCAGCTGTTGATCGAGAACAGCAGAAGAAGTGACGAACCTTTTAGTTTGCAGGCGATGAAAGAAGCA	81	83		cyp26a1	336285;236285	NM_131146.2:840
66	FOXA3	NM_131299.1	105-205	TGGAATCCTTTCTACAGTGAGGCAAATGAGATGTATTCCTCTCCGAGCGCCATGAACTCAGTGAGCAGCTTGAACAGCTACATAAATCTCAACTCGGCCT	82	82		foxa3	328454;228454	NM_131299.1:105
67	ism1	NM_001012376.1	2165-2265	TGCTATAAGAAACAGACAGCACCGTCAACAATGCGCAGAGATCTTCATATGGTCTCCCTCAAAACCTTGGGTTTAAAAGTGGAAAATCCATCATGGTTCT	83	78		ism1	373711;273711	NM_001012376.1:2165
68	tbx16	NM_131058.1	570-670	GAAGCTCACCAATAACGCGCTGGACCAGCATGGACATATTATCCTTCATTCTATGCACCGCTACCATCCACGTTTCCACATTGTTCAGGCTGATGATCTG	82	80		tbx16	328426;228426	NM_131058.1:570
69	Gadd45b	NM_213031.2	960-1060	CTCATATGTGCAATGGGGTTGGAAAGCGACGGGTGTATACGTCACTATCGCTGAATGCGGGACGAACATTTTGAAGGACTGAGCTAATAATCTGTGTATG	82	80		gadd45b	373825;273825	NM_213031.2:960
70	HER1	NM_131078.1	135-235	CGGATCAACCAGCGTTTGGAAGAACTGCGAACGCTTCTTCTGGATAATACTTTAGATTCGCGACTTCAAAACCCTAAACTGGAGAAGGCTGAAATTCTGG	82	80		her1	373760;273760	NM_131078.1:135
71	SHISA2	NM_001003631.1	125-225	TGGCATCAGTCGTTCTACCGCTGTCTTCTGCATTATCGGGGGAATATTGTCATGGTTGGACGGATTCCTTTAACTCTTGGCACCGGGGATTCCAGTGTCC	79	82		shisa2	373702;273702	NM_001003631.1:125
72	admp	NM_131876.2	783-883	GGGAAACACGGTCCGGAGCTTCTTCGACAAATTGCACAGTGAACGAATCGAGTATCTCTTCAACATGTCCACTGTAGCCAAGAGTGAGAAGATCCTGACG	84	83		admp	373657;273657	NM_131876.2:783
73	otx1a	NM_131215.2	420-520	GACATCTTGGAGAGTCTGTTCGCTAAAACCCGCTATCCTGACATTTTCATGCGCGAGGAGGTCGCCCTGAAGATTAATTTGCCCGAGTCAAGAGTGCAGG	77	84		otx1l	373774;273774	NM_131215.2:420
74	ntlb	XM_001343597.2	105-205	ACGGAAAGAGAGCTTAAAGTCGCTTTGGATGAAAATGAGCTTTGGCAGAAATTCAAAGCACTGACAAATGAGATGATAGTGACCAAGAATGGCAGGCGCA	82	84		LOC100004296	373865;273865	XM_001343597.2:105
75	bambia	NM_131784.1	140-240	ACTCGCGCTAGTTTCGGATCCTCCGATGGAACAAGACGCGAGCCTTTTCTGCGCCCGTTTGATTTTTGGATACAGTGTAGATCACAGATCCCTGGGAATG	82	79		bambi	373795;273795	NM_131784.1:140
76	bhik	XM_001332835.2	1826-1926	GGAAAAGGAAAAAGCAGATTCAGCCTGACTAGTTGCCGAGCGGAGAAGCAACAACCACCTGAATAAACAAACACTTGTAGGTGAAAACCCTCAGGTTTCT	85	82		LOC795947	373661;273661	XM_001332835.2:1826
77	il17rd (sef)	NM_153660.1	565-665	ACTAACAGTTGTGAAGTCCTTCTTGGCCCAGATAACCTCGTCTGCAAACCATTCTGGAAGCCCAAGATGCTGAACGTTTCTCAGCTGGGATCTAATTTGC	82	81		il17rd	328481;228481	NM_153660.1:565
78	xbp1	NM_131874.1	1280-1380	TAGCGTCTGAAAGTTTGCATACGATTGCGAATACCGCTTGCCTTTGCTCCTTTATTGTACGTGATTGCCACGTGCAACATAGTGATAATCTGGCAGAAGC	79	78		xbp1	335015;235015	NM_131874.1:1280
79	cdx4	NM_131109.1	1400-1500	ACCAATGACCTGCGATGTCAGGCTGTTTTATGCGCCAGTTTGTGTCCAAAGCGCACGTCGTTCACTTTCTTTTCACAGGGGTGATGTGCAGGTGTCACAT	80	79		cdx4	328431;228431	NM_131109.1:1400
80	cst3	NM_001031673.2	205-305	AGATTCTCAGAGTGCGCTACAGTTCGCAATGGCCCAGTACAACAGACAAAGCAATGATGCGTATGTGAGAGGTGTTTCCAAAGTCACCAAGCTCCAAAAA	85	81		cst3	373723;273723	NM_001031673.2:205
81	foxd5	NM_131270.1	735-835	CCAGCAAAGGCCCGAACACAAAACCCAGAGGTGCTCATTCAGCATTGACAGCATTATGGCCAAATCAACGGAGTCTTCCAGCAAAAGCTCTGCTCATCAC	86	84		foxd5	373777;273777	NM_131270.1:735
82	hsp47	NM_131204.1	300-400	TACCACAATGTGCTAAAGAAAGGGCTCGAGAACATCTTCATCTCACCTGTGGTGGTGGCATCTTCTCTTGGTATGGTGGCAATGGGAAGCAAGTCCTCCA	84	85		hsp47	373772;273772	NM_131204.1:300
83	lfng	NM_130971.1	995-1095	CCATTGGCTATATCATCGAGTCAGTTCTTGGGGTCTCTTTGACCCGAAGCAGCTTGTTCCACTCGCACTTAGAGAACCTGCAACAGGTGTCTAAATCAGA	79	83		lfng	373756;273756	NM_130971.1:995
84	magi1b	NM_001007063.1	935-1035	CCTCGTGAAGGAGAGGTGCCGGGAGTAGATTACAATTTCTTGTCAGTGGACGAGTTTCTGAAGCTTGAACAGAGTGGGACACTGTTGGAGATCGGATCTT	82	82		magi1	373708;273708	NM_001007063.1:935
85	tph1b	NM_001001843.2	390-490	CGCAAGCAAACAAGCATAATAGCAATGAACTCACCTGATAAGTTCTGGACTCCTGCAAGCGATCTTACTGAGGTGCCTTGGTTCCCTAAAAAAATCTCAG	84	82		tph1b	373697;273697	NM_001001843.2:390
86	myca	NM_131412.1	585-685	GGTTTCAGAGAGACTGGCGTCTTTGCACGCTGAAAGGAAGGAACTGATGTCTGACAGCAACTCAAATCGACTAAACGCGAGCTATTTGCAGGATCTGAGC	86	85		myca	358840;258840	NM_131412.1:585
87	mycn	NM_212614.1	1680-1780	ACACAGCTAGTCTTCAATACGCGATTGGGTCGACGAACTTTGTTCACGCTCTTCCTGCAAAATAGACACTAAACAAATGACACGAGACACTTCGAATGGC	79	82		mycn	328494;228494	NM_212614.1:1680
88	ccnd1	NM_131025.3	3397-3497	ACACGGTGCAGAAATTCATGTATAAGTGGCTGCCTGTCTTGTTCTGAACACAGGAGACCTGGCAGGTCCCCACCAAGTCGTTGTCTTAATAAATGTGACG	81	82	X	ccnd1	328382;228382	NM_131025.3:3397	also may target PREDICTED: Danio rerio G1/S-specific cyclin-D1-like (XM_002662916) >98% similar
89	ccnd2a	NM_001089445.1	220-320	AGATGGACACCATTATAAGAGCCCGTCCTGATCCGAATCTTCTGTATGATGACAGGGTACTACAGAGTTTGCTGACCATCGAAGAGAGGTTTCTTCCTCA	81	82		zgc:162280	373738;273738	NM_001089445.1:220
90	ccnd2b	NM_001045068.1	30-130	GTCGTGCGAGCTCAGAAAGATCCCAACATCTTCTGCGATGAACGAGTATTGCAAAGTCTTCTAACAGTGGAAGACAGATACGTTCCGCAGGGACCTTATT	81	82		si:ch211-240j22.2	373727;273727	NM_001045068.1:30
91	ccnd3	NM_001006017.1	100-200	GCTAATTGAACACAACCTCGCGTCGCACTTGCGACTGACTGTGGAGTATTTGGTGATGGAGTTGTTCTGTCACGAGCGCGCCGATCTGAACTCGAGCTCC	83	85		zgc:103502	373705;273705	NM_001006017.1:100
92	elk4	NM_130930.1	1680-1780	GTGTCTGCGGGACACTTTAAAACTGTCCTTTTTGGGATTTTCTCCACTGCGACTGAAGCAGATGGGTATTCAGCTCCATCTCTTGGCAAAACGGGCATCT	76	85		elk4	373754;273754	NM_130930.1:1680
93	lef1	NM_131426.1	1710-1810	ACAGACAATCACTAACGCAGACCCGTGAACACCTTCCTTTCGTTGTCTTTAATTCACTCCCGAAGCCGAAGGCGTTGCACTGATTATGTTCCTCGACCGT	78	81		lef1	336286;236286	NM_131426.1:1710
94	jun	NM_199987.1	115-215	TACGCAGTAAGTTTCTCGCGGGACGGGGAGTTGAGGAACTTTTCCAATCCTCTCGCTTTTGTTCCAAACACCGCAGCGCTCGTTACTGAACGCGGACAGT	82	81		jun	373810;273810	NM_199987.1:115
95	axin2	NM_131561.1	2335-2435	AGTTTCCAAACCCTCAAAACAAAGGCATTCAACATCAAGCCTTCAGAGAGACAAGAGTCACCCAGTGCCTGTTCAGAATGGCAGTTCAGCATTTCCAATG	81	82		axin2	373791;273791	NM_131561.1:2335
96	ncam1a	NM_131202.1	200-300	TCACTCCGACCCAGGGAGAGATCAGCGTTGGAGAGTCCAAATTCTTTCTGTGTGAAGTTGTTGGAGATGCTAAGGAAATAGACTGGTTTGCACCCAATGG	84	83		ncam1	373771;273771	NM_131202.1:200
97	ncam1b	NM_131831.1	3000-3100	GAAAACGAGTCTGTTCAGAGTCCATCTCATGCCGCTTTAAATCCCATCAGCCCACAGGGCGACATCGCTGTCCCATTAGTGAATCATGAACTTGAGATTG	78	83		ncam3	373796;273796	NM_131831.1:3000
98	bmp4	NM_131342.2	730-830	GATTCGTTTTTAATCTCAGCAGCATCCCAGAGGACGAACTCATATCCACCGCAGAGCTTCGCGTCTACAGGCAACAAATAGATGACGCCTTCTCAGACCC	78	83		bmp4	328457;228457	NM_131342.2:730
99	cldn1	NM_131770.1	465-565	TAACGCGAGGTATGAGTTCGGGAAGGCTCTGTATGTGGGCTGGGGCTCTTCAGCTCTCTCCATCATCGGCGGTTCCCTGCTCTGCTGTATCTGTGGGAGT	85	86		cldn19	373691;273691	NM_131770.1:465
	birc5a	NM_194397.2	478-578	CCACGCGATTGATAAATTTGAAGACGCAGTGAAGCTCAAGAGAAACCAGATCATCCAGACTGCGATGGGAGAGGAATGAAGAGGTTCATTGAGAGCATTT	82	84		birc5a	373658;273658	NM_194397.2:478	probe removed
100	vegfaa	NM_131408.3	28-128	TATTTCTCGCGGCTCTCCTCCATCTGTCTGCTGTAAAGGCTGCCCACATACCCAAAGAAGGGGGAAAGAGCAAAAATGATGTGATTCCCTTCATGGATGT	83	84		vegfaa	328366;228366	NM_131408.3:28
101	fgf18a	NM_001013264.1	310-410	CCAACTTTTACCTGTGTATGAACCGCAAAGGAAAACTCGTAGGCAAGAAGGCCAGCAACCGTAGCGCCGACTGCGTCTTCATAGAGAAGGTTCTGGAAAA	82	85		fgf18a	373713;273713	NM_001013264.1:310
102	fgf18b	NM_001012379.1	0-100	ATGCGGTCCGTCCTGTGGTCTGCTGTCGTGCTATGCTACCAGGTCGTGTTACTGTTCTACAGCCCGTTACAGGTGCTGGCCGTGGATAATGTCAACTTTG	84	82		fgf18b	373712;273712	NM_001012379.1:0
103	id2a	NM_201291.1	1110-1210	ATATGTGCAGCATAGTGACCTTGCCTTTTATATCCAGGACTCTGAAGCATGTCACTGACCCTTCAAACTTGCACATTCGCCCAAGGAATGTTCTATTGAA	80	79		id2a	330216;230216	NM_201291.1:1110
104	id2b	NM_199541.1	410-510	ACAGATGACCTCATAGCCCTGTCTCGTTGAAATGGTGAGTTGATTCATCTTCATGCTTTGACAAGCCAAGTTAAACTTTTGCACGTGGGGCAGTTTGCTG	80	78		id2b	367750;267750	NM_199541.1:410
105	jag1a	NM_131861.1	205-305	GATGATTCTCAGACCGAGCGCAACTTTTGCGGCGCTGTCCGCTCACGTGCTGCTGAGGTGCTTGTGGATGCGGGTATGTGAGGCTTCGGGGCATTTCGAG	85	85		jag1a	367741;267741	NM_131861.1:205
106	jag1b	NM_131863.1	485-585	GGCTTGCAGTTTCGGAACTGGATCTACGCCCGTTCTCGGTGGGAATAAATTTTCGACCAAGGGAACGCGCAGTGAAAAGTCAAGGATTGTTTTACCCTTC	82	79		jag1b	367743;267743	NM_131863.1:485
107	jag2	NM_131862.1	4880-4980	TGAAGACCCACAATCCCTTCCCTTACCAGTCCTCCTGTTGCTGATCATAAAACCGAGACCTGCCGGTTCATGCTTGTTGCTTGTAAAGATGCTGATATGT	83	81		jag2	367742;267742	NM_131862.1:4880
108	nos2a	NM_001104937.1	1155-1255	GAAAGACCAGGCACTCGTGGCTATCAATGTTGCCGTCATTCACAGCTATCAGAAAAATAAGGTCACCATCACAGATCACCATTCCGCAAGCGAGTCCTTC	83	82		nos2a	373741;273741	NM_001104937.1:1155
109	nos2b	NM_001113501.1	1000-1100	CCAAAGATTTGATTTTGGAAGTTCCCATGGAGCACCCACAGTATGAGTGGTTTGAGGATTTGAACCTGCGTTGGTATGCATTGCCTGCGGTGTCCAACAT	80	80		nos2b	373743;273743	NM_001113501.1:1000
110	fgf20a	NM_001037103.1	370-470	TGTACGGATCTGAAAAGCTGTCAGCCGAGTGTGTGTTCAGGGAGCAGTTTGAGGAGAATTGGTACAACACTTACTCTTCTAACCTGTATCGGCATGGCGA	83	83		fgf20a	373725;273725	NM_001037103.1:370
111	fgf20b	NM_001039172.1	7-107	CTATGGGAGAGATCGGGACGTTTTTGCAGAGCCTGGAAGGTTTCGGACAGGTCGGTTCACAGTTCTTCCTGCCACCTCTAGGAGAAAACCTCGGACTGTT	84	83		fgf20b	373653;273653	NM_001039172.1:7
112	sox9a	NM_131643.1	72-172	AGCGAGCACCGTGGATTTGCAGGAATTAAAAGCTACAAAGGATTTTTTGGAGGCGCGCTCGAATTCTCTGAGATCGTCCATCTACGGTGTTCGCATGAAT	78	81		sox9a	373690;273690	NM_131643.1:72
113	sox9b	NM_131644.1	1463-1563	TGCCCGCTCACATCCATACTCTCCAGGTACTCAATCAAAATGCAGTGTTTGGAGCGGTGCTCCTTCTGTTGACGTTAACCTGAGGGTGTCCATGGCAACT	81	83		sox9b	335010;235010	NM_131644.1:1463
114	runx2a	NM_212858.2	140-240	GAGCCAACGTGTGGCTATGGCGTCTAACAGTCTTTTCAGCTCGGTGACTCCGTGTCAGCAGAACTTTTTCTGGGATCCGAGCACCAGCCGCAGGTTCAGT	84	83		runx2a	373824;273824	NM_212858.2:140
115	runx2b	NM_212862.1	26-126	GGGACTGACGGCGCTCCTCTCACGCAAACGGAGGACATACGGTGCTCTTTGGCTAATTTAGACTGTTGTGATGCGCATTCCCGTAGATCCCAGCGCCGGC	85	84		runx2b	373672;273672	NM_212862.1:26
116	grem1a	NM_212852.2	419-519	TACATCCCTCGACACATTTACCAAGAGGATGGCGCGTTCCAGTCGTGCTCCGTGTGCAAGCCCAAAAGTTTTACGACCGTCACTTACACGCTCTTCTGCC	83	80		grem1a	373660;273660	NM_212852.2:419
117	grem2	NM_001017704.1	683-783	ACGCTCGGCTCCTGTAAACACACAACTCACTCCAGAGGAGTTACAAATGCTGGACCACAAAGACTGATTACCACAACACATGCATAACTAGACTGATCCT	85	86		grem2	345477;245477	NM_001017704.1:683
	sall4	NM_001080609.1	1845-1945	CAACCTTAAAGCTCATTATGGTGTTCACAGGGCCAACACTCCTCTGAAGATGCAACACTCTTGCCCAATTTGCCATAAGAAGTTCACCAACGCAGTTGTT	83	79		sall4	373735;273735	NM_001080609.1:1845	probe removed
	zgc:85866	NM_001001826.1	85-185	CGAGCTGACAAACACAGACGCGAAGATGTTTGCTTGGGCTGTTATCGTCATCTTTATTGCACACTTAGATATGGTGTCCTCCAGCTGCCCGGCGGTGTGC	82	84		zgc:85866	373696;273696	NM_001001826.1:85	probe removed
118	cyr61l1	NM_001017653.1	820-920	ATCAAGAGTGGATTTCATCCTCTAAGTCCCGCCCTATCGCTCCAGCCACCTGCTTGCTGCAGATCACCGATTGGTCGCCATGCTCTGCCACCTGTGGAAT	84	86		zgc:112060	373717;273717	NM_001017653.1:820
119	cyr61	NM_001080987.1	2126-2226	TTGACACCAACTTGTCCACTGGGGTAGTAACCATAAATTGCTATAGTATTTTTCAAGTGTGAGAGCCCACTTGCAGCTGTTCTTTTAAACAGACCCCAGA	78	80		cyr61	355097;255097	NM_001080987.1:2126
120	sox2	NM_213118.1	2-102	TGACAAGGGCTCTGGCGAGGAGGGAAACCGAGTTTGTGTTGATTCTTCAAGACTAAGAAAAGAAGTTTGTGGGCACAACAGGACCTAAGAGCGCTTCCTT	82	83		sox2	335024;235024	NM_213118.1:2
	pttg1ipb	NM_001005941.1	415-515	CTGCTGTAAATGTGAAAACATTGGCAGGTCTAAAAGGAGTGAGGAGCGAATGGAGAATCAAGCTAGTCTGAGAAAGTTTCGTCATGAGGAGAGGAAAGCA	85	84		pttg1ip	373704;273704	NM_001005941.1:415	probe removed
121	foxn1	NM_212573.1	245-345	GAGTCGCCCTGCTTTCAGATGCCAGAATCACAGTGTCACCAAAGCAATGGTGGAGAAGAGTTTGTGCCGTACTCCCAAAGAGAAAGCGATCCCTACAGCC	85	85		foxn1	373820;273820	NM_212573.1:245
122	mmp23bb	NM_001017890.1	435-535	AATAAAGACGATACCCGTAAAGCCATCAGCATCGCCTTCACCAAATGGAGCGACGTCTCTCCTCTGACTTTCACGGAAATCACCAACACCAGCAAAAGTG	83	83		mmp23al	373718;273718	NM_001017890.1:435
123	nanog	NM_001098392.1	473-573	AAAGATGCAGAGCAGACCAGCAGTGATACACCCAGTGATTCCGAGGCCCACACGCCAGATTCCTGGAGCTCAGCGAGCAGTCGAGAAGGGGTTCCTCTGA	85	85		zgc:193933	373686;273686	NM_001098392.1:473
124	pou5f1	NM_131112.1	2210-2310	GCACTCTCCCATCTCCAAGTGAAATGCCTCTAGATGTACTCTTTGTCAGGGTGGTTTTACATAAATATGCTGCCAGTTTGAAAGCCTCTCTGTGGAGGTC	82	79		pou5f1	373761;273761	NM_131112.1:2210
125	snai1a	NM_131066.1	1330-1430	CCCTGACCGCCACATCTCTGAAAACAGGTGGCGTCTGCTGATTTCTCTAGAAACACACTTGGAGAGAGTCCTTATGGAGCACAGTTGACTGCTTTACTTT	83	80		snai1a	328427;228427	NM_131066.1:1330
126	snai1b	NM_130989.3	691-791	AGACCCACTCCGAGGTGAAGAAGTACCAGTGCGGGTCGTGCTCTCGGACCTTCAGCCGCATGTCTCTCCTGCACAAGCACACACTGTCCGGCTGCTGTCC	85	83		snai1b	328506;228506	NM_130989.3:691
127	snai2	NM_001008581.1	2320-2420	CTATCCCTTTAATTGAAACTGACCCAAGACAGCCTCTGAGCTGGTTCCTGGAGAACCTTCAACACCCTCATAAGAGAAAAGACTGTTTGCAGGAGCTCAT	83	83		snai2	328392;228392	NM_001008581.1:2320
128	snai3	NM_001077385.1	470-570	GGACTGACAACCACTGGCAACAGTCAGGAACACAGCGATGAGTGTTTTGACTGCCAGAAAGCTTACCTGTCCTTCTCTAATCTGGCCAACCAGAGGCAGG	85	85		snai3	373733;273733	NM_001077385.1:470
129	fn1	NM_131520.1	4265-4365	CGTTATCATCCAGTCGATGAAGATGACGAAACTACTGAACGCACTGTGGAAGGAAGTGAAAACTTTGTTGTCCTTCGCCATCTTGTGCCCAACACAGAGT	82	80		fn1	328468;228468	NM_131520.1:4265
130	fn1b	NM_001013261.1	2304-2404	TGACACAGTATCTGGATTTAGAGTTGAATATGAACTCTCAGAAGAAGGAGCTCGGAAACGTGTGCTTGACCTCCCAAGAACAACTACATCAGTGAACATT	80	83		fn1b	373651;273651	NM_001013261.1:2304
131	itga5	NM_001004288.1	3615-3715	ATGTGGGTTTCCACTTTTAACCACCACTTACAGCCTGCCGCTCACAAACAGTTTTGGGTTGATCTGAACCAAAGCTCAGGATCACTGGCAACCTGCTAAA	82	83		itga5	373703;273703	NM_001004288.1:3615
132	itgb1a	NM_001034971.1	830-930	TGACGCAGGTTTCCATTTTGCTGGAGATGGGAAACTCGGAGGAATTGTGCTTCCTAATGATGGGAGGTGTCACTTAGAAAATGACATGTACACCATGAGC	83	83		itgb1a	373724;273724	NM_001034971.1:830
133	flrt3	NM_001256646.1	390-490	TTATAGCAGCACAGGAGATTCTGCTTTCAAGCCACGAGGCTGGATATTTTTATTCATGCTCTTGCCAGGAGTGAGACTACAGGATTCGGGCCTGACTTTA	80	83		flrt3	373753;273753	NM_001256646.1:390
134	frzb	NM_130943.2	960-1060	GAAGGAGATCAGGATTAGAAATCATGACCTGAGCGCCATTGTGGAGGTCAAAGAAGTTCTGAAGTCATCTCTGGTCAACATCCCTCGAGACACGGTCACT	83	82		frzb	328411;228411	NM_130943.2:960
135	fzd2	NM_131140.1	1725-1825	GAAAGACACTGCACTCTTGGCAGAAGTTCTATGTGCGTTTGACCAGTGCTGGACAAGGAGAAACCACTGTTTGAAACGAGACATTGTGATCCACAATTTC	82	81		fzd2	328433;228433	NM_131140.1:1725
136	fzd5	NM_131134.2	1425-1525	TTAATGATCCGTATTGGGCTCTTCACCGTTCTGTACACTGTACCTGCCACTATTGTGGTGGCGTGCTTGGTGTATGAGCAACATTACAGGCCAAGTTGGG	80	83		fzd8c	373767;273767	NM_131134.2:1425
137	fzd7b	NM_170763.1	1910-2010	ACAACGGTGTGAACTGAACTTTGTGGACTGCATGTGAGAAATACAGGTCAATATAGAAAGGAAACGTGAACTGCGATCAGGTCACACATTTGCTGATGGG	84	83		fzd7b	330205;230205	NM_170763.1:1910
138	fzd8a	NM_130918.2	45-145	ACCGGGAGTTTTCTTGTTGACAGAGAAGTTTTGAAGAACAAACCGCGGCTTTATTTTTTAACACATCGCCGGAGCGGGAATAAGGAGAGGAAATACGAGA	80	79		fzd8a	328409;228409	NM_130918.2:45
139	fzd10	NM_130917.1	614-714	AGTTATGCCGAACTTAATGGGACATGAAGATCAAAATGAGGCAGCCATAAAGCTGCATGAGTTTGCTCCGCTGATTGAGTTCGGCTGTCACAGCCATCTG	83	84		fzd10	373655;273655	NM_130917.1:614
140	sfrp1a	NM_205585.1	160-260	GCAGTTCCTGAGCAGGAGTCCACAATGAAGTCCCTTGCATCTTTGTCCCTTTGGAGGATCATCATTTTGATACTGCCACTGGTCTCTTTAGGCCAGACAT	83	79		sfrp1a	373817;273817	NM_205585.1:160
141	sfrp1b	NM_001083571.1	80-180	AGTATTTTCGTCCTTGTGCCATGAAGAACCTTGCCCTGAAGCTGTGGCTCTCCATCGCTCCGTTTCTTTGTCTGCCGCTGCTCAATGCCTTGGAGGATGA	82	81		sfrp1b	373736;273736	NM_001083571.1:80
142	sfrp2	NM_001077384.2	710-810	CTGACCATGACTTTAGGAAGACGGTGCTTTGGCTAAAAGATGGTCTTCAGTGTGTGTGCGATGAACTAAATGACATCAATGCTGCTTATTTGGTGATGGG	81	80		sfrp2	373732;273732	NM_001077384.2:710
143	sfrp5	NM_131858.1	665-765	ATCGATAATGATCTATGCATTCCTATGCAGTTCTCCGCAGGACACGCCACTCAGACTCCAGTTTCCAAAGTGTGTCCACCCTGTGACAACGAGTTGAAAG	82	82		sfrp5	373797;273797	NM_131858.1:665
	fsta	NM_131037.3	3150-3250	TCTCATTTAGAAAAGCCCTGCTGATTCTGCTGTCCTTCATAAACAGCAAGAAATGGGCAGTGGGTGATGATTGTTTCAGAAAACTGTGCCATGCAACTGT	79	83		fsta	330192;230192	NM_131037.3:3150	probe removed
144	fstl1b	NM_001039621.1	850-950	GTGCAATCGCTGCGTCTGCGCTTGTGGAAACTGGGTCTGCACCGCCATGACTTGTGATGAGAAAACCCCGGTTTTTGACACTGAAGGGGATCAGGAGATG	89	83		fstl1b	330204;230204	NM_001039621.1:850
145	isl1	NM_130962.1	1267-1367	TATCTCCTGCATCTGAAGTTTGCGAAAGGACGTGTCCGGGAACCAATCTCAGAGAGAGGCTCGTGAAGTTTCTTCCATCCCTATTTCATTTAGGGCCGCT	83	79		isl1	345495;245495	NM_130962.1:1267
146	mmp2	NM_198067.1	1650-1750	CGTTCTGGAGTGAGCTTCCGGAGAAAATTGACGCAGCTTATGAAAACCCTCTGGAAGAGAGGACTGTCTTTTTTGCTGGTGATGAGATGTGGGTATATTC	82	79		mmp2	373806;273806	NM_198067.1:1650
147	eng1a	NM_131045.1	470-570	CACCGTTTCATCTCCGGTTTCCAGCAGGCAGTCTAATAAAGTGGAGCAGGGATCCAGTAAATCCTCCTCGCCCAGTAAAGACAGCCAGAAGCAGATTTTG	81	83		eng1a	373759;273759	NM_131045.1:470
148	eng1b	NM_001013498.1	220-320	TCCGGATACTGTTCATTGCAACAAGTGGAATTTTGGTGTGCAGACCACGATCCAGCTGTCATGGACGAGCAAAAGGATCAAAATAGTCGTGATTCGACTG	80	82		zgc:113499	373714;273714	NM_001013498.1:220
149	eng2a	NM_131044.1	170-270	CTTCATCGACAACATCCTGCGACCAGATTTTGGCCGTAAAAAAGAAGCGAATATCACGCGCTATGAGGACAATCACGGCGCACGAGAGAATCACAACCCT	80	86		eng2a	373758;273758	NM_131044.1:170
150	eng2b	NM_131040.1	635-735	AAAAAACTGATATTAGCACGGACGAATCTCTGAAATCCCGTGCAGAGACTGGAGATCAGTGTTTAAGTTCCGATTCGGACTGCTCACAAAGATGCGCTGC	83	82		eng2b	373757;273757	NM_131040.1:635
	rarga	NM_131339.1	670-770	GCTTCGAGGTTGGCATGTCCAAGGAAGCTGTGCGCAACGATCGAAATAAGAAGAAGAAAGACGTGAAGGATGAGGTCATTCCGCCAGAGAGCTATGAGCT	84	86		rarga	373779;273779	NM_131339.1:670	probe removed
151	ved	NM_183074.1	875-975	CACAGCGGGACGGTGTGCAATATTGATAGTAACAGCACAGGACTGGCTTTATTGTGCTGAGGAATTATTTAAAGATGTAAATCTGGAGGGAACAGAAGCT	83	80	X	ved	328387;228387	NM_183074.1:875	also may target PREDICTED: Danio rerio ventrally expressed dharma/bozozok antagonist-like (XM_002664718) >98% similar
	stra6	NM_001045312.1	455-555	TTACTCAGCCCAGTAAACTTTTTAGACCACACGCAACACAAGGGCCTTGCCGTAGCGGTGTATGGAGTTCTCTTCTGCAAGCTGGTTGGAATGGTCCTCA	84	82		zgc:136689	373729;273729	NM_001045312.1:455	probe removed
152	rhoua	NM_001007443.1	1670-1770	GGAGTACAAGCAGATGTTTGGACGGAATATCAACTTGACATGGCTGACATTTACCTTGTTGTCCTGTGAGGGTGAATGATTGTCCAATGCAGAGACAGCA	84	82		rhoua	373709;273709	NM_001007443.1:1670
153	twist1a	NM_130984.2	635-735	GATGCACGCGTTTGATGCAGCATGATTCTCGGCCTGAGGAGCTGAACTCACTGGAAGGAGCGGCTCAAAACAAGGGCGAAAATAAGGATTATAAAGGGAA	86	85		twist1a	367732;267732	NM_130984.2:635
154	twist1b	NM_001017820.1	789-889	AATCTTGGGGAAAACGGCAAATGTTCCAACAGAGGTCATGGCTGTTACCGAGAGAAGGCCACGGGCAGCGAATTGTCATATGGATTTCCTCGCGAGTCTT	84	83	X	twist1b	367697;267697	NM_001017820.1:789	also targets PREDICTED: Danio rerio twist-related protein-like (LOC100535497) XM_003200171 @100%
155	twist2	NM_001005956.1	692-792	ACGCGTCCTGATAATGCCGAACGGACTGTTTACTTCCACTAATTTTGAGGATGCCAAAGGATTATTCGATGAACCTCTAAACCTCAGTGACGTGGCCAAA	78	83		twist2	367703;267703	NM_001005956.1:692
156	wisp1a	NM_001166230.1	1160-1260	TAAGAACCCTAATGACATATTTACTGATCTAGAACAGTACCATGAGAAGCGGGAGATCTGAAACTGCGTAGATACAGTCAATATGAAGACTTGGATTTAT	81	80		wisp1a	373666;273666	NM_001166230.1:1160
157	wisp1b	NM_001113628.1	155-255	TTTGACATCCAGTTTGCACCAGGCCAGTTTCCACAACTCCACAGACTCTCCTCCTGTGACCACAGAATTGGACCCTTATAACCGAAATCGATACTGTAAA	82	81		zgc:172276	373744;273744	NM_001113628.1:155
158	wisp2	NM_001199101.1	0-100	GGCTTTTCTTCCAGAAGTCCATGTTTCATCACTGCACACCAGAGCAGGCGAGTGGAGGGAGAAAATCATTTCTGCTTGTGGAAATGGGCAACGGAGATGT	81	85		wisp2	373752;273752	NM_001199101.1:0
159	wisp3	NM_001166231.1	25-125	TTTGCAAGCCGTGTATGATGCTATCACTACTGTGCTGGTTTCTGCTGATCTTTCTGAGTCGGGGTGCCGATAGCAGGCGAGAAGGGACAGGCCCGGCGGA	80	85		wisp3	373667;273667	NM_001166231.1:25
160	cdx1a	NM_212836.3	1600-1700	TTGGTTAACACAGCGCAAAACGCTCAATTGGCGCTGCACCATTCACGTGTATCGCGCTATTCGCGCCGCACAATTCGCGTCATTCACACCGTGCCATTCA	82	79		cdx1a	373823;273823	NM_212836.3:1600
161	cdx1b	NM_001098762.1	25-125	CTATGCACTGGAGCCACCAGAAAAAATGTACGTGAGTTATCTCCTAGATAAGGACTCCAGCATGTACCCGAATTCCGTAAGACACCCAAGCCTAAATTTA	82	83		cdx1b	358826;258826	NM_001098762.1:25
162	ptgs1	NM_153656.1	1435-1535	GTCATAACATTCACCCAGTGGTGTCCGGAGTTGCTGAGAGGGTCATCGTTGAATCGAGGGAGCTTCGACTTCAGCCGTTCAATGAATATCGCAAGAGATT	82	80		ptgs1	373799;273799	NM_153656.1:1435
163	ptgs2a	NM_153657.1	1150-1250	CGAATTCAATACCCTGTATCACTGGCATCCACTGTTGCCGGACAACTTTCAGATCCAGGATCAGATCTACGGCTATCACCAGTTTGTGTTTAACAACTCT	80	79		ptgs2a	373800;273800	NM_153657.1:1150
164	irx3b	NM_213100.1	730-830	ACACGGAGGACATCGAAGATAAACAGGATTGTGACTATCAGGATGATGATAAGTCAACACCTAAAGGTTCCGATTCTGAGGAATACGACGATGCCAGAGC	82	82		irx3b	335023;235023	NM_213100.1:730
165	six3a	NM_131362.1	910-1010	AACAACCAGTGTCTCGAGTATGACAGAACGAGTCGACACGGGCACGTCAATTCTTTCAGTAACATCAAGTGACTCGGAATGCGACGTATGATACGCACAC	85	79		six3a	373780;273780	NM_131362.1:910
166	six3b	NM_131363.1	13-113	GTTGCACTCTAAGTTGATTAAGGGTAGATATTCGCGCTCGGTGGCACTGCGGCGATAGCAGCGCAAACACGACGTCGGGTTTTCCGTCTTTCCCCGTCGT	82	81		six3b	373671;273671	NM_131363.1:13
167	neurog1	NM_131041.1	75-175	CTCAAGCATCTCCCAGCCCACCAATAAGGTTATCAACAATGGAGATCGTATACTCCGATATGGAAACCTCAAGCTGTGACTACTCCTTTTCGCACACGGA	82	83		neurog1	358832;258832	NM_131041.1:75
168	sp5	NM_180973.2	200-300	AAACAGCAAACATTCTCCTCTGGCACTTTTAGCAGCGACGTGTAACCGGATCGGTCACCACCACGGATCCACTCCCACGGACTTTATTCAAGTTCCCTAC	83	83		sp5	334986;234986	NM_180973.2:200
169	sp5l	NM_194371.2	1430-1530	AAGAGCTAAGAGAGAGAACTTTTTTAGAGTCTGGAAGTTTGGCAGTGGTGAAATGGTTGCGATGGGAGCATGGGCCTGTTTCTACTACTGTATGTTTCCT	80	80		sp5l	328488;228488	NM_194371.2:1430
170	nkx2.2a	NM_131422.2	110-210	CAGCAACTTGACTGCATCAAATGCTCCAGAACATGTCGTTGACCAACACAAAGACGGGCTTTTCAGTAAAGGACATTTTGGACCTCCCTGATACTAACGA	81	81		nkx2.2a	335006;235006	NM_131422.2:110
171	nkx2.2b	NM_001007782.2	210-310	ACCTTCACTGTCGCAGTCCTACTGGTTTGGAAAATGTCCCTAAAGAATTCAAAGTCGGGTTTCACTGTACGTGATATTTTAGACCTCCCGGACACCAACG	79	79		nkx2.2b	373710;273710	NM_001007782.2:210
172	gbx2	NM_152964.1	90-190	AATAACTCAAGGGAGGACGATAAAGCTCATGTGAGATGCTCGACCTTTTTCTCGCCCAGACTTTTCTCAGCCAGGGAGTTGTCTGTGTTTCAATGCACTT	81	78		gbx2	373798;273798	NM_152964.1:90
173	egfra	NM_194424.1	2625-2725	CTAAAGGTATGAATTATCTAGAAGAGCGCCATCTTGTGCACCGAGACCTGGCAGCACGTAATGTGTTGGTAAAGACGCCTCAGCATGTCAAGATTACCGA	82	82		egfr	373805;273805	NM_194424.1:2625
174	cdh1	NM_131820.1	37-137	GAAGAGCTGCGATTTATTTAACACACTCGAGGGATTAAAACGCTAAAGGATTTGACTTGTAGCGAGTCAAATGGCTTGTGTAACAACTGTGGGATTAGGA	80	79		cdh1	328511;228511	NM_131820.1:37
175	cdh5	NM_001003983.1	2336-2436	GGATTATGATTTTATACATGAGTGGGGACCTCGGTTCAGGACCCTGGCTCAGCTTTATGGAGTAGACGGCTCTGATTCGGATAGCTCCTACTGAAGTCCA	83	84		cdh5	355088;255088	NM_001003983.1:2336
	cki	NM_131108.1	164-264	GAGGAACCGGGGTCCGCATCTCCAGTTCTTCTCTTTCTCGATCCTACTCTTCTGGAAGCACTGGCTATGGCGCTGGCTTCCATCTGTCTGATGCCATTGA	81	86	X	cki	373647;273647	NM_131108.1:164	probe removed
176	fgf4	NM_131635.2	2832-2932	AGCCTGAGATTAGTGGAAACAGCCACTCCAACACAACAATGTTCCAAATTTTGCCATTGTCTGGATGTGCTTATGAACAGGGATGTATGCTGTGTATTGA	83	79		fgf4	373648;273648	NM_131635.2:2832
	vcana	BI326807.1	120-220	TGCGGTAAACGCTGTATCTCTGAAGTCTTCTTGTATACGACCTTTGGTAGTTGGATGGGCTCATGCAGGAAATCCCTGGGAGAAGTCCCATAAGCCGTCG	77	86		BI326807	373650;273650	BI326807.1:120	probe removed
177	vcanb	NM_214688.1	3825-3925	TCACGCACTTTGCTCGGTCAGTGTGTGTGAAAACGGCGGAACATGCTTCTCCAGCAGAAAAGGAAATGTTTGTGTCTGCATGCCTGGATTTAGTGGGGAA	83	83		vcanb	373827;273827	NM_214688.1:3825
178	eif1axa	NM_001006082.1	535-635	CCTGGAGATGATGATGAGATCCTGTTTGATGATATTGGAGAGAACGATGACGACATTGATGACATCTAACTCAGGACAGCTGGTGGGTTATATTGTTTAC	81	78		eif1axa	373706;273706	NM_001006082.1:535
	tbl2	NM_212767.1	841-941	ATTTCCCACAGAAACACAAGGGAGTGATTATCAACATTGGAATTGCTGAGACGGGCAAATTTATCATGTCTGCCTCTGTTGACACAACCATTGTGATCTG	80	79		tbl2	373659;273659	NM_212767.1:841	probe removed
179	si:busm1-142b24.1	NM_001006661.1	1835-1935	GTCTGATTCAATTCCTGCAGCAAAACAAAACGCTAGTAGACCTCAAAGAGCCTCTCTGAGAAAACAGCGTTCAGCAGAAAAGGATACCTTTCTGGATTCA	81	81		si:busm1-142b24.1	373707;273707	NM_001006661.1:1835
	si:dkeyp-46h3.2	NM_001114887.1	547-647	CAACTGCTATGCCTCAAATTCACAGACACTGGTTGCTAATGCATGTGAAGGGAAGAACGTCTGTGCCATTTCAGCCTCCAACGGTGTCTTCTCAGATCCG	82	82		si:dkeyp-46h3.2	373654;273654	NM_001114887.1:547	probe removed
180	actb2	NM_181601.3	1647-1747	CCTGGGCATATTGTAAAAGCTGTGTGGAACGTGGCGGTGCCAGACATTTGGTGGGGCCAACCTGTACACTGACTAATTCAATTCCAATAAAAGTGCACAT	84	82		bactin2	328374;228374	NM_181601.3:1647
181	eef1a1l1	NM_131263.1	1455-1555	CCAAGTGAATTTCCCTCAATCACACCGTTCCAAAGGTTGCGGCGTGTTCTTCCCAACCTCTTGGAATTTCTCTAAACCTGGGCACTCTACTTAAGGACTG	78	82		ef1a	328447;228447	NM_131263.1:1455
182	plgrkt	NM_001033098.1	1074-1174	GTAATGTCCGGCAGATCCTCATGTAAGTGTTCAGGCATCCGCATGTAAAGCGTCTCCTGATGAAGTGATGAGTAAATCGTCTGTGTGTCCTCAAAAAAAA	80	77		zgc:110385	373674;273674	NM_001033098.1:1074
183	dffb	NM_194404.1	795-895	ACCTGGAATCTTGACCACCTGATAGAAAAGAAGAGGACTGTCATTCCTGCTCTCGCCAAGGCACTGGAGGCCAATAAGAGCAATGATATAAATGTGGATT	85	85		dffb	373804;273804	NM_194404.1:795
184	fam65a	NM_001045108.1	25-125	GCGCCAGAAACTTACTCGTGCCCTCCATCGCGTTCAAAGTATCAGATTCATTCAGCGCGCGGATTGAAAGACGCGGATTTGGATTTAAGCACCGATGATA	80	80		fam65a	373728;273728	NM_001045108.1:25
185	tmem44	NM_001045355.1	255-355	CTTTATCACAGATGTAGCGTTAAAACGCGAAGCAAGAATTGGGGTGATGAAGCGGTCTGCGCGCTGTATTGTTTCGTCGGTAATTTGTGCAGCGCAGTGG	79	80		zgc:153362	373730;273730	NM_001045355.1:255
186	zgc:109949	NM_001020730.1	1310-1410	GTGTCCACTGGATGGCGCAATAGCAGACTATTAATTTTATCCGATCCGGAAGACTGAATAAGCGTTAGTTTGACAGCCTTCTCAGAGAGAAAGACCACAT	79	82		zgc:109949	373719;273719	NM_001020730.1:1310
187	znrf2a	NM_001102637.1	275-375	TATTCGGGCGGTTCGACGGGTCAGATCGGTGAACGGGTCCAGTATTCATCACAGTTGAGTCCGGCTTCATTCATCCAGAGCGCCTTCATCTCCACAGGCG	82	83		zgc:171663	373740;273740	NM_001102637.1:275
188	plin2	NM_001030262.1	315-415	CTGGCGTGCAAAGGACTTGATAAGATAGAAAAGACTCTGCCGATCCTACACAAGCCATCTGAACAGATTATGGCCAATGCTAAAGATGCAGTGACAGGAG	86	85		adfp	373721;273721	NM_001030262.1:315
189	elovl6	NM_199532.1	355-455	GCCATCAGAACTGGGGGCTATATGGTAAACATTTTGATGACCAAAGGCCTAAAGCAGTCAGTGTGCGATCAGAGTTTCTACAACGGGCCAGTCAGCAAGT	85	85		elovl6	373807;273807	NM_199532.1:355
190	spaw	NM_180967.2	635-735	GGAGACGACTTTATTGAATCTCTCACAAGCAGCTGGCCAAGAAAAATCCAGCATCCCACAGCAGAACGAGTCATGATTGTAGTTTTCTACAAAGAAACTG	83	79		spaw	373801;273801	NM_180967.2:635
191	hoxc9a	NM_131528.2	415-515	GCCGGAGACTGTTTGGGCTCGAACGGACGTACTTATACGGATTATCTCTACTGTTCAGCCGTCGACATTAGAGAAAAGCAACAGAATACACCATCGCCAG	82	83		hoxc9a	373781;273781	NM_131528.2:415
192	hoxc4a	NM_131122.2	83-183	AATAGCTACATTCCCGAACATAGCCCAGAATATTACAGCCGTGCAAGGGACAGTGGCTACCAGCATCACCACCAGGAGTTATACCCTCCGCGGGCAAGCT	85	86		hoxc4a	373689;273689	NM_131122.2:83
193	hoxd9a	NM_001128296.1	280-380	TGGTCCTCGGTTCATCAGCCATCTACTGCTGCTGTGTCCGGGATTTACCATCCATACGTTCACCAGACCCATCTTTCAGACAACAGATACGTCCGATCCT	83	81		hoxd9a	373748;273748	NM_001128296.1:280
194	hoxd11a	NM_131167.1	265-365	GTGACTTTTAGGGACTATGGACTGGATCATCCGAGCAAATGGCATTACAGGGGCAATTACGCTTCGTACTATTCAACGGAGGAGATAATGCACCGAGATC	83	83		hoxd11a	373770;273770	NM_131167.1:265
195	evx1	NM_131249.1	650-750	TCTCTCAACTATGGCTCTGACCAGATGCGAAGGTATCGAACAGCATTCACGAGGGAGCAGATAGCTCGACTGGAAAAAGAGTTTTACCGGGAAAATTATG	85	83		evx1	373776;273776	NM_131249.1:650
196	setd1ba	NM_001045134.2	7237-7337	TGTATGTTTGTATGAATGACATAAGCTCACTGGTACTTCAGGCGGCCCTCTCGAGGTGCTCTTTGCTCAGTATTTACAGCCTCATTCGGCCAAATTTCCC	82	77		setd1ba	373688;273688	NM_001045134.2:7237
197	gli1	NM_178296.2	620-720	GAACATGATGACATCCCATCATAATCTCCCTCATAACCAGCACACATCTGAACTCATGGCATCAGGAGACGCCTCTTGTTTCTCCACTCCTCGCTCGATG	83	83		gli1	335019;235019	NM_178296.2:620
198	onecut1	NM_200573.1	111-211	AAAAAATAGAAAAGAAAGCAAAGAAAAATTACTCCATATAAGAACAGAACTTTTCCAATGAGAGCACTTCTGTGGACACTGCTCCGCTATATCAGATAGA	78	81		onecut1	373675;273675	NM_200573.1:111
199	nr2f2	NM_131183.1	2670-2770	GTATTACAGACGCTTACCTAAGGTTGCGCCCAAGCGAATTTTCGCTCAAGTGTTTAGCCTCAGTAAACTGTATTTGTGAACGTGGGGAAATGATGGGTCA	78	79		nr2f2	367733;267733	NM_131183.1:2670
200	mettl3	NM_212780.1	1685-1785	GTCTCCAGGCACACGAAAGATTGAATTGTTTGGCAGGCCACACAATGTACAACCTAACTGGATAACTCTTGGTAATCAGCTGGACGGCATTCACCTTTTA	83	80		mettl3	373821;273821	NM_212780.1:1685
201	zic3	NM_001001950.2	760-860	ACATTTTTGGCCGTCCAGATCCATATCGACCTGTGGCGAGCCCTCGTACGGAACCTTATGGCGCCGCTCCGCTGCATAACTATAACCATCCCATTAATAT	82	81		zic3	373699;273699	NM_001001950.2:760
202	otx2	NM_131251.1	1200-1300	CTGCCATCCTTCCAATAACAGAAGTGTTCCGTGACGCGCGAACTCTCCCAGATGGATGGGTTGCATTAAGCCCAAGAGCGCTTGTGAAGTTTGAAGTCTT	81	80		otx2	328445;228445	NM_131251.1:1200
203	otx1b	NM_131250.2	215-315	GAGGTTTTTCCTGCCGATTTGACTTCCTGAAGCCTTCCACTGCTGGATATTTTTATCTTCAGCTCAGACTACAAAATTCCAGAGGAGAAGGACGGAGTGT	79	80		otx1	328444;228444	NM_131250.2:215
204	six4b	NM_131717.1	1140-1240	CCACAGGTGGCCATTTCTTGACCTTTGATCCTCAGAGGGTCTCCCATCACAGTCAGGAAAGGCTGTTAGGTGGGTCTTCCGTGTCTTATGCTCCATTCTC	83	81		six4.1	373793;273793	NM_131717.1:1140
205	six1b	NM_207095.1	1125-1225	CTCTGGTTTTCAGAGAAATACTCAGTGGTACACTTTACCGTGGTAGACTATTACGGACTGACATTTGCCAAGTCGTTAAACTGGTCAGAAGACAAACCAA	77	81		six1b	373818;273818	NM_207095.1:1125
206	h1m	NM_183071.2	205-305	AGATGGTGAAAGAAGCTTTAAAAGAGCTGGACTCCAGAAAAGGTGTTTCCGCTCAGGCTATTCGTGGCTACATTAAAGAAAAGTACACCACTGTAGACGA	83	83		h1m	373802;273802	NM_183071.2:205
207	nasp_common exons	SchierJD_016.1	125-225	GAAACCTTGCTCCTCAAGCACTGGAGACAGTTCTGTCGATGTCGCTGAGGAAGCAAAGAAGCTGATTGGCACTGGAAGTCGGCACTTAGTGATGGGTGAT	85	86		SchierJD_016	373838;273838	SchierJD_016.1:125
208	nasp_sperm exon	SchierJD_019.1	5-105	ACCAGGGATGAACTTCGAGCACAGGTTTATGATGCCATGTCAGAGGACAATACTCGGTCAGAGGTAGAAAAAGAGGAATGTGGTGAAGGCGAACGGAACA	86	86		SchierJD_019	373841;273841	SchierJD_019.1:5
209	charon (dand5)	SchierJD_009.1	165-265	CTAAACCCTCATTTTCTGCGCCGGGCCGCCGTTAGTCATGTGCCGTTCAGAAATTCACCAAGTCGAGGCGCGTTTCCCGCGTTCTTGGCCCTCGGACGTC	80	82		SchierJD_009	373833;273833	SchierJD_009.1:165
210	chd2	SchierJD_049.1	3700-3800	CCCTGCATAAAGCTGTGCCTTCAAATCCTGCTGAAAGGAACAAATTTCAGTTGACCTGCCGGGTGAAAACTCCTCACTTTGATGTGGACTGGGATATTCA	81	84		SchierJD_049	373859;273859	SchierJD_049.1:3700
211	ende	SchierJD_045.1	109-209	GCGCAGATAAACATGGTACAAAACACGATTTTCTCAACTTGAGGCGGAAATATCGCAGACACAACTGCCCGAAGAAACGCTGTCTACCTCTTCACTCCAG	80	85		SchierJD_045	373683;273683	SchierJD_045.1:109
212	fto	SchierJD_037.1	685-785	TTTAACGTCACGCTAATCAACTACATGAACCCTGCAGCCATGACCCAGCTGAAGGAAGAGCCATATTACGGCATGGGCAAAATGGCAGTCGGTTGGCATC	85	85		SchierJD_037	373852;273852	SchierJD_037.1:685
213	ctnnb2	NM_001001889.1	2850-2950	AGCGTCTCTCCTCATGGGTCGGTCACTGATGTACAACACTAATCTGAGTTCTGTCTGATCGGGCCGAACGCAGAATATCGAGTAGCTTTTCTATGCGGGG	83	83		ctnnb2	373698;273698	NM_001001889.1:2850
214	dnd	NM_212795.1	630-730	TCCCATTACGCCGCATCCATGGCTAAGAAAGTGCTCGTGGAAGCTTTTCGGAACCGGTACGGCATTTCCATCACCGTCAGATGGACTTCCTTCTCCAAGT	81	82		dnd	373822;273822	NM_212795.1:630
215	slc24a5	NM_001030280.1	945-1045	CACGGACTCAACGAAATCAGCGACGAGCACAAGAGTGTTTTCTCCATGCCGGATCACGATCTGAAGCGAATCCTGTGGGTTTTGTCTCTTCCGGTCAGCA	84	81		slc24a5	373722;273722	NM_001030280.1:945
216	hcrt	NM_001077392.1	329-429	CTGCTGCACAACTCACGGAATCAAGCCGCGGGGATCCTCACAATGGGGAAGAGGCTGGAGGAGCCCGCTAAATTCCTCATCCCTACGGTACCACAGGATG	86	85		hcrt	373685;273685	NM_001077392.1:329
217	cx41.8	SchierJD_010.1	945-1045	CAAGACTACTTAGGGGTCAACTTCTTGAGCTTCTCACAGACACCTACAGAGACTCCCAACTCCTGTGCCTCACCTTCATTCCTGAGCAGTGATTTTGAGG	84	83		SchierJD_010	373834;273834	SchierJD_010.1:945
218	kdrl/flk1	NM_131472.1	455-555	AACATACCCAAACCAAAACGTTATCCTTGAGACGCAGATGAATCCTATGGCAGATGATGTTAAAAGAGGGGTACAGTGGGATCCAAAAAAAGGTTTCACG	82	81		kdrl	340356;240356	NM_131472.1:455
219	flt4	NM_130945.1	620-720	TCCTGACCTAAAAGTCACTCTCTTCTCGTTAGTGCCGTATCCAGAGCCTGTGGATGGCAGTGTGGTCACCTGGAATAATAAAAAGGGTTGGTCGATTCCC	82	82		flt4	340353;240353	NM_130945.1:620
220	tie1	SchierJD_027.1	620-720	GGGATAAAAATGAGTGCTGCAATTAAAATGCTCAAGGAGTTCGCCTCAGAGAATGACCATCGAGACTTTGCTGGAGAATTGGAAGTGCTGTGCAAATTGG	82	83		SchierJD_027	373846;273846	SchierJD_027.1:620
221	gata1	NM_131234.1	175-275	ACAGACTCTGGTTTACTGCCACCCGTTGATGTAGATGAACCTTTCTACTCAAGCTCTGAGACTGACCTACTGCCATCGTATTATTCCACCAGCGTCCAGA	81	83		gata1	328442;228442	NM_131234.1:175
222	nphs2	NM_001018145.1	727-827	GTATCTGTTCGAGAGATACTGGCCCATCATGCCTTCAATGACATTTTGCTGGACAGGAAACGCATTGCTCAGGAGATTCAGGTCACTTTAGATTCCGGAA	78	83		nphs2	345478;245478	NM_001018145.1:727
223	foxA1	NM_131284.1	65-165	CGCACGCTGTGAGTGTGCGAACTGCATGTGCACGAGCTGTGGATTTCCTCCATAATGTTGGGCGCAGTGAAAATGGAAGGACACGAAACTCCAGACTGGA	85	85		foxa1	373778;273778	NM_131284.1:65
224	sox17	NM_131287.2	975-1075	TCAGTTCAATAAACCTGCAGCAGGTATTTCACGAGAACGCCAACCCGCAAATCAGTCATCATCCGGGTACTCACCTCAACATTTTTAACAGAAGCCCCTC	83	80		sox17	328453;228453	NM_131287.2:975
225	hhex	NM_130934.1	690-790	GAGCATCAGTTCACCCTATGATAAGCCCTGCTCTTACTGTAAATACTGCACCATACTGTACATTCCGCCATACCTGACCACTGACTTAATGGATGTGTAT	82	81		hhex	328410;228410	NM_130934.1:690
226	cp	NM_131802.1	2080-2180	GACACCATCAATGTGTTTCCTCATATATCTCACACCGTCATCATGGAGCCCGACAGCATGGGGCAGTTTGAGGTCAACTGTAAAACTACGGATCATTATC	79	82		cp	358847;258847	NM_131802.1:2080
227	pdx1	NM_131443.2	53-153	TGTGCTCGTGTACGGCACGGTTTCCCCGGTCTATGGCAATCATGAATCGGGAAGAGCATTACTATCCGCCTAACCACCTGTACAAGGACTCTTGTGCCTT	83	85		pdx1	345512;245512	NM_131443.2:53
228	ins	NM_131056.1	130-230	GTGTGGATCTCATCTGGTCGATGCCCTTTATCTGGTCTGTGGCCCAACAGGCTTCTTCTACAACCCCAAGAGAGACGTTGAGCCCCTTCTGGGTTTCCTT	84	82		ins	345453;245453	NM_131056.1:130
229	mettl3 downstream peptide	SchierJD_041.1	154-254	GCGGCATCAGCTGCCCACAGGCCTACTTCTCCCACAAAGCCCGGCTCTCACTGCGGCACCAGATGGACAGTAACATCAATGCAGTGGACGCCACATACTA	85	85		SchierJD_041	373687;273687	SchierJD_041.1:154
230	dkk1b_linc	SchierJD_040.1	255-355	AGAAGGTCCTCAGTTTCCCACACAACCCGGAAATTAGCTGGACAGCTGAACTGGAGATAACATACTGCATAAAGGGTCTCCTCTGCCACATAGAGAGGCT	85	85		SchierJD_040	373854;273854	SchierJD_040.1:255
231	pitx2_elovl6_linc	SchierJD_008.1	114-214	CGGGCCTCGTCTGTATTATCCAGGGATTCATCCGAACACACACGCACACACACCCCTGATGGAGTCATCTGGCGAAGGCATGGCGCTGTTTTTTGGTTCA	84	82		SchierJD_008	373677;273677	SchierJD_008.1:114
232	spaw_linc	SchierJD_007.1	345-445	ATAAAATCTCAGTCACATTCATGATTTGTCCTGTCATGACTATAAAGGTCTAATGACAGCCTTGTTAAAGCCTCCTTCAAGTCGCTCCCTGAAACGAAAG	73	82		SchierJD_007	373645;273645	SchierJD_007.1:345
233	charon_linc_bothisoforms	SchierJD_017.1	145-245	CAGAGGCAGTCTGCTACACTCAGAAGGGTCCAAACTAATATAAAACGATGAATTTGCTCATAATCTCGAGTCTGTACATAGCGCCTTGGTGAGACACGAG	85	80		SchierJD_017	373839;273839	SchierJD_017.1:145
234	charon_linc_maternal	SchierJD_001.1	190-290	CGACGGGTCAGAAGTCATGCTATTTTCTCAGCGCTCTTATCCAGGGACTCAGGAACGACTACAGGTCACCATCAGGTCATGAAAAGTGATGTCATTTCTC	81	82		SchierJD_001	373829;273829	SchierJD_001.1:190
235	hoxc6a-hoxc1a_nc	SchierJD_047.1	370-470	TTCAGCAGCTCAGCCATTTCAAGTCTCCGGTTGCGGCACAGCCTCACTTGTGGATTTCCAGAGGCCCATGACTGAAGGTCGCAGCTCTAGTTTTTGATCA	83	81		SchierJD_047	373857;273857	SchierJD_047.1:370
236	hoxc13a-hoxc11a_nc	SchierJD_004.1	164-264	CTTGAACGACACGGAGGCGCGCCGAGGAATGATGGGTACTTCTTACCAAATTTCAAGAGATACATCCTCTCCAAGGCCAAGTAAAAAGGGGCCCTCGCGA	85	86		SchierJD_004	373673;273673	SchierJD_004.1:164
237	hoxD3a_sense_linc	SchierJD_013.1	319-419	GAGTAGTCTATAACTAAAGTGAATATAGAAAAATCCACACACTGACATCTGAGTTTATTATTGCTGCCTTAAGTTACCCAACCCAAGTCAATCATTGTGC	79	74		SchierJD_013	373664;273664	SchierJD_013.1:319
238	hoxD3a antisense downstream	SchierJD_035.1	555-655	TGCCCTTCACTGCCTCCACTCTGAGGGGCTTTTAAAGCTGTCATTTAATGCAGTCCGGCTGAATGCTGCGTATGCAAATGGAAAGATGCCTTCTGAGTGT	81	85		SchierJD_035	373850;273850	SchierJD_035.1:555
239	hoxBa antisense	SchierJD_003.1	250-350	GCCTCTTAATCTCAGTTCTGGAAGCTGGCTTATTTCCTTGACCCACCACCCTTCCTCTTTGTCGTCACTTGAGTAGCTGATGTGCGGCCGGAGCCCTCCC	81	85		SchierJD_003	373831;273831	SchierJD_003.1:250
240	evx1_upstream overlapping hoxA	SchierJD_029.1	342-442	CGCCACGCAAGCCATTCTATGCCCCGGATGGAGTTTCACAAAGTCGCTTCTACATCAGCGAAATTTACTAAGGCAGAAACCAATATAACATGACAAGTAG	83	79		SchierJD_029	373680;273680	SchierJD_029.1:342
241	six3a_OS	SchierJD_006.1	59-159	CAAATGTCACGCTGGAAAATCTTTAATGGGCTAAGTGTAGCCTTTCCGGCCCCAACTTGTCAGGTAATCAGAAATCTCCGTGACTCCTCTCCCTCCTCTC	80	83		SchierJD_006	373676;273676	SchierJD_006.1:59
242	six3a_upstream	SchierJD_053.1	92-192	AAGAGAGACACAGACAGTGAGATGAGCCAGCGACCTGACTTCTACTGAAAGCGAGATGAAATCCTCACCTGTCCATCTGTATCACATCAGGGGGAAAACT	86	86		SchierJD_053	373695;273695	SchierJD_053.1:92
243	setd1ba_linc	SchierJD_054.1	285-385	ACCTAACCATTTAAGGTCGGAGAAAGAGTCTCAAACACTGTGTGGCATTTCAATCAGCAAGTACAAAGGGAATATCCAGTCCTCTGTGCTCTCTCTCTCG	80	82		SchierJD_054	373862;273862	SchierJD_054.1:285
244	gli1_linc	SchierJD_011.1	96-196	TGATGGGACAGGATGACTGTAGATGTTCCCCTGTGGCCTGGAGTAGTTGATGGAGCTGGAAAAACCCAACGATGGACTAAAAGCACAAGCTCGGGATGTT	85	86		SchierJD_011	373668;273668	SchierJD_011.1:96
245	onecut1_linc_upstream	SchierJD_014.1	35-135	CCGACCGAAACGGAGTTTTTGCCCGTGGATGCTGTGATTCGATCATGGAAATGGTGGAAAAGCGATTATCCCGCTGGACAGGACGCGTTGGATGGATGCA	81	86		SchierJD_014	373836;273836	SchierJD_014.1:35
246	onecut1_linc_downstream antisense overlapping	SchierJD_012.1	25-125	TGAGGGTGACATTCAGGAAAACTGTCAAGATTCTACACCACCTGATTGTATTTGGCATCCCTGGCTAGATTTGGGATACCTAAAAACACAGAGGTTATGG	82	82		SchierJD_012	373835;273835	SchierJD_012.1:25
247	chd2 upstream	SchierJD_033.1	265-365	GAAGTTGGCTTGTAGAGGACCTTCACCAAAGTTCAAGAAAAAGAAGACTGCTCTAACCAATTCTGGACAGTCAAGTGGAGACTACTGCTTAATGAGGAAG	82	84		SchierJD_033	373849;273849	SchierJD_033.1:265
248	sox9a_linc	SchierJD_023.1	210-310	CTCCAGCACACACACATCTAATGGAAAGCTGTGTTTGATGGACTACATGAAGGGAATATATGTCAAAGTTTTCTGACGGATGTTTTCCCGCACAATGGGA	84	77		SchierJD_023	373843;273843	SchierJD_023.1:210
249	nr2f2_linc	SchierJD_043.1	218-318	ATCACCGACCATTCAAAAGCCAGTGAACAACACAGCCGAAAGCAATCCAGCAGAAGTAAATTATATCGAACCAATGCAAAGTGGATTTTACCCCAAGACC	85	77		SchierJD_043	373682;273682	SchierJD_043.1:218
250	pdlim5 - linc - bmpr1ba	SchierJD_051.1	25-125	AACTCATTTAATGTTGAACTGACACATCATTCAGACGGACTCACGGACACCAAGCAGCTTTACAACAACTCGCGGACACTTTCACCTCTCAGCCGGTGAT	80	84		SchierJD_051	373861;273861	SchierJD_051.1:25
251	itgb1a - linc - nc/fbxl7	SchierJD_021.1	64-164	TTCCATTAAGTAGGAATGAACTGATGTGAAAGCACCATCTCAGAGAACAGACTGTCAGGACTAAACCCCATGAACAACGTCACTGAATTTGCTGGAAAAA	82	84		SchierJD_021	373678;273678	SchierJD_021.1:64
252	igf2bp3 (insulin-like growth factor 2 mRNA binding protein 3; VG1RBP) - linc - tra2a	SchierJD_056.1	140-240	TACATGCACAGAAAAAGTGGAGGAGGACTTCGTTTTCATGAGGGACAAAACAAGTTACATAACCCGTGTGTGGAGGTGGGCCTGACCTTTGACTGTGGGC	83	85		SchierJD_056	373864;273864	SchierJD_056.1:140
253	from Guttman lincs: smad7 - linc (single exon) – dym	SchierJD_046.1	9-109	CTGTGTGTATGCGTCTGTGTGTGAGGGACGCAGGCTAATCTCTCCCTCCCGGACGCCTCTCTGTCCGCGGGAAACACTCATGAACGGGCGGATTTAACCC	86	85		SchierJD_046	373669;273669	SchierJD_046.1:9
254	from Guttman lincs: irx5 - or peptide?	SchierJD_024.1	145-245	CGGCAGTATTAACATGACTTCCACGAATCCGACCGAGGCAGGAGAAGACCCTTTGACTGAAGACGGTGGCACACATGATGCTCAATCCAGGCACGAGCTG	85	86		SchierJD_024	373844;273844	SchierJD_024.1:145
255	iqgap3 - linc - eomesb	SchierJD_044.1	135-235	GTGCCTCCTGCAGTGGTCAGTGAAGATGTTGTTGATCATCCGCATCCAGTCTTTTCTCTTCCAGCCTACAGTCCAGTGCCGTCCTCAGAACCGCCGGCAT	82	83		SchierJD_044	373856;273856	SchierJD_044.1:135
256	lasp1_linc	SchierJD_048.1	210-310	CGAAACACAAAGGAAGAAGCTCTGTCTCTCTTCTTTCTGATATATGGAGGAGATGAAATGTGAACACACTGGAAGATTCAGGATACAGGATGAGACTTCC	80	86		SchierJD_048	373858;273858	SchierJD_048.1:210
257	lasp1_antisense single exon trx	SchierJD_034.1	190-290	CTGTGTGTCCGGCGGACTGCAAACCCTTCCCGGCTGCTCAACACTGCTGGCCGCCCTGCGAGAAACAGATGCAGCGGGCGATAATAATAGCCGCGGCCAG	88	87		SchierJD_034	373665;273665	SchierJD_034.1:190
258	antisense single exon to foxp2 upstream exon	SchierJD_039.1	309-409	GGTCACTAAAGTTGCTTCCTTGATTTCACCGCGTGGAAACTTCTGCAACAGTATATCAGCGTTACAAAAGCCCAGTATATTATCGCTGCATGAGATGGAG	78	79		SchierJD_039	373694;273694	SchierJD_039.1:309
259	birc6_nc (megamind)	SchierJD_030.1	4-104	GGACGACCACTGTCAGTATAGAGGAGGTTCGGGCGCAAGAGGGTAAAGAGGAGCGAGAGGAGTCCATATTGGCCCTTCTGGGGATCATAGGCACCTTCTT	85	84		SchierJD_030	373693;273693	SchierJD_030.1:4
260	Oip5_nc (Cyrano)	SchierJD_036.1	195-295	TCTTCAAACCGCCCTTCATCCTGATAAGTTGACCTTCCTCCAGCGTTATTTCAGGGAAGTGTTTGTTCAGCATACCAAGCCAAGTGTTACTGGTCTATGA	77	80		SchierJD_036	373851;273851	SchierJD_036.1:195
261	zic3_nc	SchierJD_028.1	240-340	GGACGCCCTGTACCTGCTCTCTCTGTGTGTTCTGGAGGTTACGAGGCAGGTTTCTAGTTTTGGGAGGTGGATGGATGCTGAGGACCTGAACTGAATGAGC	85	86		SchierJD_028	373847;273847	SchierJD_028.1:240
262	phox2b_nc	SchierJD_050.1	770-870	GGAGGAGGAATATCTCAATGTGAACATGAATAGGCAGCCATCAGGATCCGTCATAAGTGCTCCATACGTGGCCTGCACACCATGCTCTCTGCTCTTCTCC	85	85		SchierJD_050	373860;273860	SchierJD_050.1:770
263	gas5_nc	SchierJD_026.1	15-115	GTATGGAGATGGCGTCAGTTGACTTGAGGTTCCCCAAGAAGATTGAAAATGTATGAAGACTCCAGCTGATATGCAAGATGTCTGCATGTGGCCAATCGTT	81	83		SchierJD_026	373679;273679	SchierJD_026.1:15
264	gas5_like_nc (mmd2)	SchierJD_022.1	106-206	CATTGAACGCGACGAGCTTTCGCAGTTCTCATTGATGCAAGTGCAGAAAAATGCCTTGGAGGATTTGCACCATTGTCATTTGCACATGTTCAACATCTGC	78	77		SchierJD_022	373692;273692	SchierJD_022.1:106
265	otx2_linc	SchierJD_002.1	365-465	CAGCCACCATTATCCTGGTCCAAATGTTTTGCAAGCTCTGGTGGGCAAAAGCAAAGTGGACATCATCTGATGTTATCTTGTGTGAATGTTTGGAGGAGCA	82	79		SchierJD_002	373830;273830	SchierJD_002.1:365
266	otx1b_linc	SchierJD_038.1	90-190	TTGGGCCTAATTCTGTCCCACAATCCCACAGTGCCTTGCGGCAAGGAGACTCACTCTTTCTCCTGGGCGTCCAGGTCTCGGACCAGCGCATCTCGTTTGT	86	82		SchierJD_038	373853;273853	SchierJD_038.1:90
267	six4b/six1b_nc	SchierJD_005.1	215-315	CTCTCTGGAATGATGGCGGCATGTAGGTCATTCTATACTGGCCTTGAAACCCAAACCAGGTCCAGATTGTGTGTGCTGCATGGTCCCGTGGCTGATAAGA	84	85		SchierJD_005	373832;273832	SchierJD_005.1:215
268	rab36_linc	SchierJD_052.1	22-122	GGGATGGTTTTTCACCACACCTCAAGTGATTTTTCGTAAGAGGAAACAACACTGCACATATTGGCATATTCATCTAAACGCCAGTGGATGGATTCTTAAG	76	78		SchierJD_052	373684;273684	SchierJD_052.1:22
269	mctp2_linc	SchierJD_032.1	221-321	ATCAGAGAAGGACCTTAAATGGGAGCAATTCTAGTTAAATAGAAGAAGATGGAGAATTATCGATCCCTTATCCCGAAGGTGTCCACCGTATGCAGATGTC	80	81		SchierJD_032	373681;273681	SchierJD_032.1:221
	non-coding/coding (nc)	SchierJD_042.1	35-135	TGTGCGACCCGGCAGTGAATGGGTTAGTTTTTGCATTACAATGGATAGTAGTGATTTTCGAGAAACAAGCTCTCCAGCCATCTTTGCTACGAGACGGCGG	78	82		SchierJD_042	373855;273855	SchierJD_042.1:35	probe removed
	non-coding/coding (coding)	SchierJD_031.1	655-755	CACTACAGAGTATGCGCCCTACGGCTCTTCAGACTGTTTGTTTTCATACAACGACGACAGTTATTTCAGGAGGGATATCTTAAACCCAGAGATGTGCTAC	77	82		SchierJD_031	373848;273848	SchierJD_031.1:655	probe removed
270	tmem88b_nc	SchierJD_055.1	120-220	TCGCGTCATAGTATGGTGTATTACCTGAGTTGGCGGACGCGGGTTTTGTGATGGTCGGTGAAAAACTACAGCTCGTGCTCCCAGATCGCTGTCCACAACA	79	85		SchierJD_055	373863;273863	SchierJD_055.1:120
271	MALAT-1	SchierJD_020.1	5-105	GGGAGGGGCAAATTCGTTTCTCGAGTTCTCTTTCCCACAGGCCCTGTTCACATTAGAGGCGATAAAACCAAAAAGGGATTCCAGGATGTTGTGTGGACCC	80	84		SchierJD_020	373842;273842	SchierJD_020.1:5
272	gdf6a_nc	SchierJD_025.1	670-770	TCTGCTTGCGTTATCATGACAGACAGAGCACATGTTCACCGTGATACTCTAGAAAACACGTGGAAGGCGAAGCAAAGACATCCAGTTCATGGGATCTCCT	81	86		SchierJD_025	373845;273845	SchierJD_025.1:670
273	gdf6a	NM_001159994.1	1635-1735	AGTTGTCGGCAGGTAGAAGAAACGACAGATTTAGTGCGTACCGTCTGGACAGGATTCACTAAGGATTGTGTTACACCATTATCCGCGTGGACTCAGAAGA	84	80		gdf6a	373750;273750	NM_001159994.1:1635
274	apelin_nc	SchierJD_015.1	365-465	GAGAGGTAGACTGAGTACTGCGCAAATTTTCTGTTCGTCCAATAAACAGGAAGGGTTTCATTTCTCTTGCTGAATGATCCCTCCACTGGCATATCTGACC	79	80		SchierJD_015	373837;273837	SchierJD_015.1:365
275	apelin	NM_001166124.2	2255-2355	AATCAGCTCTTCATAAGAGAGTGCCTAAAAACCACAGCGGTAAAACACCCAGCCAACCTCACCTCGATTAAAAATGGATCAAATCTTTGGGCACCGTGAA	85	82		apln	373751;273751	NM_001166124.2:2255
276	ENDE_neighbor_nc	SchierJD_018.1	575-675	ACCCAGCCAGGTGGCCAGGTGATGTCAGATTGTAGTTTTGGAGACTTTTTGAGCCTAAGATTTTGGGCCATTTGAACCATTGTCCTATAACAGTAGCTGA	80	79		SchierJD_018	373840;273840	SchierJD_018.1:575
277	pax2a	NM_131184.2	17-117	CCATTCTTGAAGAGAGGGGGACTGAGAGACACTCGCCGTGTCCATGTTTTTTCCTGTCATTCCCGCACGAATCTGACTGTACCCCTCAGACTGTTCAGAC	84	83		pax2a	345505;245505	NM_131184.2:17
278	cmlc2	NM_131329.2	505-605	GTTCGACCCTAATGCCACAGGAGTTGTCAATAAAGATGAGTTCAAGAGGCTGCTAATGACCCAAGCTGATAAATTCACAGCAGAAGAGGTTGACCAGGCT	83	85		myl7	358837;258837	NM_131329.2:505
279	draculin	NM_130977.1	269-369	CAGTCGCCTGCTCTCATTGCAAAAAACGATTCACACATAAAGTGCACCTTCAGATTCACATGAGAGTCCACACTGGAGAGAAGCCATATCGATGTGATCA	80	84	X	drl	373646;273646	NM_130977.1:269	also targets zgc:136538 (NM_001045237.1) @100%
280	gata4a	NM_131236.1	50-150	GAATAATCGCTCACCTGTGGATATGTATCAAGGTGTAACGATGGCCGCCAACCACGGAGCTGCGTCTTACGAGTCCGGTTTCCTCCATAACTCGACTTCT	83	82		gata4	373775;273775	NM_131236.1:50
281	eve1	NM_131114.1	55-155	ACGAACTTGGCTTGGAAGAGAAACAGTGACGAGAGAGAATTGCTATTTTTTTAGTAGGGCCTGGTTTGGGAGTGTTTTGAGGACTATGAGAAATTAGTGA	80	79		eve1	328364;228364	NM_131114.1:55
282	hoxa1a	NM_131536.1	240-340	ATTACCTACAGCGCCCATCCAAGTTATGGAACTCAAAGTTTTTGCACTGGATACAATCACTATGCCCTAAATCAGGACGTGGAATCGTCTGTGAGCTTTC	79	81		hoxa1a	373785;273785	NM_131536.1:240
283	hoxa5a	NM_131540.1	185-285	CCCGTGCTCATCCTTAGCCAACTCTCCTGTCAGTGAGCAGTCACACCGCGCCCTGAAAATCTCACTATCTAGCACCGCTGGCTCTGCGTCCAAAAGCTTT	85	84		hoxa5a	373786;273786	NM_131540.1:185
284	hoxa3a	NM_131534.1	1270-1370	TACTCGGATTCTTTGGTGGGTATGGGGGCCTCGGTTTTTGGCCTGACGCACCTACCGCATCCATCTCAAGGCAATATAGACTACAATGGCGCTATTACCA	83	83		hoxa3a	373784;273784	NM_131534.1:1270
285	hoxa9a	NM_131532.2	320-420	CCATGCGCAACCTCCAGTAGTTGGGGATTATGTGCAGTCTTGGCTCTTGGATTCTGCATGTGGGTTACCTCAAACTGAGCCACCGACGGTTAATCACAAT	83	82		hoxa9a	373783;273783	NM_131532.2:320
286	hoxa11a	NM_131544.1	825-925	CTCTCACGGATGCTTAACCTCACTGATCGCCAAGTGAAAATGTGGTTCCAGAACCGGCGCATGAAGGAAAAAAAACTAAATCGGGACAGGTTACAGTATT	82	83		hoxa11a	373789;273789	NM_131544.1:825
287	hoxa13a	NM_001085494.1	505-605	CATCAGCTTCTACAGGCGAAGATTATACCAGCTCACGCGCCAAGGAGTTTGCCTTGTACTCAAGCTACGCCTCAAGTCCATATCAACCAGTTCCGAGCTA	83	83		hoxa13a	373737;273737	NM_001085494.1:505
288	hoxb1a	NM_131115.1	715-815	TCGAAAAAGAATTTCACTTCAGCAAGTATCTGACGCGAGCGCGGCGTGTGGAGATTGCTGCCACACTTGAGCTTAACGAGACGCAGGTTAAGATTTGGTT	81	81		hoxb1a	373762;273762	NM_131115.1:715
289	hoxb3a	NM_131117.3	235-335	TAATTTTTCATACGGGGTCTGACTCCCGTTGACTAAAGCGGGTGAAACGGATGGAAGCTGTGGTGCCGCTGTCATTTTCACTGCTTCGCTCTAATGGCGG	80	83		hoxb3a	373763;273763	NM_131117.3:235
290	hoxb7a	NM_001115091.1	85-185	GCGCTGTTTTCCAAATACCAAGTGGCGAGTTCAGCCTTCTCTACTGGCGTGTTTCCCGAGCAAACTTCTTGCGCCTTTTCGTGCAGTTCGCAGCGGGCCA	81	80		hoxb7a	373746;273746	NM_001115091.1:85
291	hoxb8a	NM_131120.1	1275-1375	CAGAATAACGGTGCTTGCATGACAGGCTTGTCTCATAGAGACATTGTAATCAAGTCGGGTGGTTACATCTTTCACTCGAGGAAGGAACAGAAAAAATACT	80	81		hoxb8a	373764;273764	NM_131120.1:1275
292	hoxb10a	NM_131541.1	1185-1285	TTTTAGTCATCATCCGTTGCAAGTGGACTGATGCAACTGCTGCTTCTGATGGATTAACGGGAGGAAGCGATCTGTCAAATCTTACTACGGCGGTTCACAA	78	83		hoxb10a	373787;273787	NM_131541.1:1185
293	hoxb13a	NM_001044912.1	0-100	ATTGCGTCAATGCAGCTGTACCAATGTAACTGAGTGTCCTGCTTTGGACTGGAGTCTTTGCAACATAATTTTCCGTCCGAATGGTGAGCGTGCTATGACC	82	79		hoxb13a	373726;273726	NM_001044912.1:0
294	hoxc1a	NM_131531.1	95-195	AACTGCTGACTTCCCAAGCAGGGAGGATGTCAACAACGAGGCGGATTTTCTTCAATATCATTTCACGAATCTCTGTGCCACGGCCACAGGCGCGTGCTCA	84	82		hoxc1a	373782;273782	NM_131531.1:95
295	hoxc3a	NM_001134685.2	150-250	CATCGTTGCACTGGAAAATCACTCGAAATGGCAAAACAGTCGAAGAATGCGGATGAAAACGGAATCACCGTTTGGCTGCTTACATGCAGTTTACAACTCA	82	80		hoxc3a	373749;273749	NM_001134685.2:150
296	hoxc6a	NM_131123.1	210-310	GAGTATGGATCTAACGTGTTTCTTCAAGATAAGGACGTGCTTCCCAGTTGCAGGCAAACTAGTATGGGACTTAATGCGCAGAGCCACGTTGCCCAGGAGT	76	86		hoxc6a	373765;273765	NM_131123.1:210
297	hoxc11a	NM_131165.1	415-515	AGCATCATCCGAACTCTAGCCACCCTTCCACCGGGTTCTACACCGGCGTGGGGAAAAACAACGTGCTCCCTCAAGGTTTTGACCGTTTCTTTGAAACCGC	86	79		hoxc11a	373768;273768	NM_131165.1:415
298	hoxc12a	NM_001110759.1	360-460	AACGAGAGGAGCGAGCAAGAGATACATCAGTATCGTCTGATCACGGGATGCACAATGGGATGGGCAACAGTGGCACCTTCTCAAAGTATGATTATGGCAC	85	86		hoxc12a	373742;273742	NM_001110759.1:360
299	hoxc13a	NM_131543.1	680-780	GGAAATCTCCCTTTCCAGATGTTGTTCCGTTGCAGCCAGAAGTCAGCAGTTATCGACGTGGGCGCAAAAAGCGTGTTCCCTACACCAAGATACAACTGAA	80	85		hoxc13a	373788;273788	NM_131543.1:680
300	hoxd3a	NM_131125.1	80-180	TCCAACACACCAGGGCTTCTCATCCTCCAGTATAGAGAATGACTATCAAAGCCCAATTTGTCCAATTCAAACTACATCAGTCCGGCAAGCAACCCATAAA	84	80		hoxd3a	373766;273766	NM_131125.1:80
301	hoxd10a	NM_131166.2	385-485	AACCGCTCAACCAGATGTCCACCTGCACATTTTCACAAAGCATAAAAGAAGAGACTAACTGTTGTATGTACTCCGACAAGAGAGCAAAGGTCAGTTCGTC	82	82		hoxd10a	373769;273769	NM_131166.2:385
302	hoxd12a	NM_001126486.1	160-260	GAAGAGAGGTGTGCTCGCTCCCGTGGAGTTCTTCAAATTCGTGCACTGCTCCGGCCCAGAGCCGCGCCTACAGTGGCTACTCTCAGCCGTTTTTCAGCAA	84	85		hoxd12a	373747;273747	NM_001126486.1:160
303	evx2	NM_131232.2	755-855	AACAATAAAGGTTTCTCGGACAGCAATTCAGGAGGCTCCAATACAAGTTCATCCTCTCTATCGAATCTTAACGGTAATTCCATGGGAAACAGCAGCTCGA	80	80		evx2	335004;235004	NM_131232.2:755
304	stau2	NM_200925.1	625-725	TCCCAAACCCATTCCCAACTACAGAGCCAATTACAACTTTAGAGGAATGTTTAACCAGAGGTACCATTACCCAGTGCCTAAGGTATTTTACGTGCAGCTG	82	81		stau2	373876;273876	NM_200925.1:625
305	ubb	NM_001013272.2	1825-1925	AAAGAGTCTACTTTGCACCTTGTGCTGCGTCTCCGAGGAGGCTCAGATTAGAACCGACAGTCTTAGGGATGGACATTAAATTCTCAGTATCCCCTGCTTA	83	80		zgc:172187	358810;258810	NM_001013272.2:1825
306	cdc42	NM_200632.1	360-460	CCTTTCCTGCTGGTGGGAACGCAGATTGATCTGAGAGATGATCCTTCTACTATCGAGAAGCTTGCCAAGAACAAACAGAAACCCATCACTCCAGAGACGG	84	85		cdc42	373875;273875	NM_200632.1:360
307	ctsd	NM_131710.1	385-485	AGACCTTCACTGTGGTGTTTGACACTGGATCCTCCAACCTGTGGGTACCTTCAGTCCACTGTTCCCTGACTGACATCGCCTGCTTGCTTCATCACAAGTA	84	82		ctsd	373873;273873	NM_131710.1:385
308	tomm70a	NM_200002.1	1310-1410	TGAGGATGTCATTAGGAGGTTTCCAAAGTGTGCTGAGGGTTATGCTCTGTATGCACAGGCATTAACTGACCAGCAACAGTTTGGTAAGGCAGATGAAATG	82	85		tomm70a	373874;273874	NM_200002.1:1310
309	usp9	NM_001077449.1	3715-3815	TTCGAGCAGTTCAGAAGATAGTCTGGGCTTCTGGTTGTGGCTCTGTTCAGCATGTCTTCAGTTCCAATGAGGAGATCAGCAAGATCTATGAGAAGACCAA	81	81		usp9	373871;273871	NM_001077449.1:3715
310	gcsha	NM_001013457.1	280-380	ATGTGGTCTACTGTGGGCTTCCTGAAATCGGCGCAAAGTTATCACAGACAGATGGGTTTGGTGCTCTGGAGAGTGTTAAAGCAGCGAGTGAGTTGTACTC	84	83		zgc:112535	373870;273870	NM_001013457.1:280
311	pcna	NM_131404.1	960-1060	TGTGACCCTCTAAAGCCATTACATATCATTGGCAGAATTGCGGGCGCACTTATTAAATGATGGTAGTTTGGGCCTTAGCTTTACCAGGCGCTCCGTGGGC	84	82		pcna	358838;258838	NM_131404.1:960
312	rpl37	NM_001002069.2	135-235	CTTCATGACCGTAGTGACTGGCGGTGGTTGTGCTACCATGTACTACCTCATGCAGAAAAACTTTGCTAAATCAGAGTACTACCGTCAGGCTCTTGAGCAG	84	83		rpl37	373869;273869	NM_001002069.2:135
313	per2	NM_182857.1	630-730	GTCAGACAGGTGGAGGCAAATGAAGAGTATTATCAGCTGCTCATGATTAATGACAGTCAGCCGTCAGGGCTTGATGTCTCATCATATACTATAGAGGAGA	82	84		per2	358850;258850	NM_182857.1:630
314	dazl	NM_131524.1	350-450	GAAGTTGTCTAACGGTTACATTTTACCTGAGGGGAAAATGACGCCCAACACACTGTTCGTCGGCGGTATTGATATGAAGGTGGATGAGAACGAGATCAGG	81	83		dazl	373872;273872	NM_131524.1:350
315	fos	NM_205569.1	1202-1302	TTTCGAATGGCATTGCAGGGCTATGGAAGTGACTCTAAAGCAATGGATATTGCTTCCTATATTTATCTGAACCATACATGCCTGCCACATGTAGCAAGAT	82	79		fos	328376;228376	NM_205569.1:1202
316	sox3	NM_001001811.2	785-885	GAACGCCGCGTCCACGTACAGCAGCATGTCACCAGCATACACGCAACAAACTTCCAGTGCAATGGGTTTGGGCTCCATGGCTTCGGTGTGCAAGACGGAG	86	86		sox3	374435;274435	NM_001001811.2:785	probe added
317	FoxH1	NM_131502.1	105-205	GCATCGCGCCTCATTCTCACTCCCATTACGCAGCGGGATTGACATGAAACTGTGAATTGTTTGCTGCTCAAATAGAGTTGACCTGGAGCCAGCAGTCTGA	83	83		foxh1	328466;228466	NM_131502.1:105	probe added
318	runx1	NM_131603.2	464-564	GGCCGCAGCGGACGAGGGAAGAGCTTCACTCTCACCATCACCGTCTTCACAAACCCTCCTCAAGTGGCCACATATCAGAGAGCCATAAAGATCACAGTGG	86	86		runx1	346753;246753	NM_131603.2:464	probe added
319	c1d	NM_001007059.1	185-285	TTGAACAAGCTAAACTGGATCTGATGTCGGCATACGCCCTCAACTCAATGTTCTGGATGTATCTTGTGACACAAGGAGTCAATCCGAAAGACCATCCAAT	84	81		c1d	374436;274436	NM_001007059.1:185	probe added
320	bmp2b	NM_131360.1	719-819	AAGTTTTCATCACGAAGAGGCTTTCGAGGCACTGTCCAGCCTGAAAGGAAAAACAACGCAGCAGTTTTTCTTCAACCTTACCTCCATTCCTGGCGAGGAG	83	80		bmp2b	328365;228365	NM_131360.1:719	probe added
321	bmp2a	NM_131359.1	435-535	TTCAGAGAGCAGATCGTGAGTTCGCTAAACAACGCAAGTGCGGGATTTCACCGCATTAACGTTCACGAAATCATCAGGCCGTCCGGTTCTCTTCAGGAGC	81	80		bmp2a	328460;228460	NM_131359.1:435	probe added
322	trim33	NM_001002871.1	565-665	ACTCGAATCGTGAACGTCATGCGTTGTACAGTGTGCCATCAGGACTACAAACAGATTGACATGGTGGACAATTACTTCGTCAAGGACACTTCAGAGGCCA	82	84		trim33	367715;267715	NM_001002871.1:565	probe added
323	C1d_neighbor	SchierJD_057.1	100-200	AGTCCACAGTGTTTACGTCTTATTTCATTGGGATCTGAGCCGACAGCATCTCCATAATGTCAGACTGACTTCATGAGGAGACGGATGCTTTTCTCACAGC	77	82		SchierJD_057	374437;274437	SchierJD_057.1:100	probe added
324	linc-zgc:153426	SchierJD_058.1	98-198	GACATCCTCCCCAGAAAGTACGGGACCTAATATTGTGGCCATCGTTGTACCAACTGTGGTGCTGGGACTGCTGGCTATTTTGACGGCGGTTCTGGTGTTT	84	83	X	SchierJD_058	374432;274432	SchierJD_058.1:98	probe added - also targets crb3a & LOC100535986 (NM_001045322 & XM_003198164)@100%
325	linc-c6orf105	SchierJD_059.1	285-385	GGATGATTATCTGAGAGGGAAACCCGAGAGCGGGGGTTTACCTTTATTTAAGAGGAAGGGGGAAGTCCTTGGAATGACCACAAAATGTTTTACTAAGAAC	81	85	X	SchierJD_059	374438;274438	SchierJD_059.1:285	probe added - also targets PREDICTED: Danio rerio si:dkey-221j11.3 (XM_002664216)@100%
326	linc-hoxb8a	SchierJD_060.1	37-137	TCACAGAGATGTTTTCGAGGAGCTAACTCGATGTTCTGTCACTTCAACAAACACACACAACGCAGTTGGCTGGCTTTTCTGTCTCACCTTGAGGTCGCAT	77	84		SchierJD_060	374434;274434	SchierJD_060.1:37	probe added
327	linc-slc6a4b	SchierJD_061.1	335-435	GCTATTGGACACAAACAGCGCAACGTCAACACGAACTACTAAATATTCTGGATGCAGGGTTACTATTGGAAGGTTACGAATCAACGTCAGCTCGACCAAA	81	82	X	SchierJD_061	374439;274439	SchierJD_061.1:335	probe added - also targets PREDICTED: Danio rerio si:dkey-234h16.7 (XR_117677)@100%
328	linc-zgc:193613	SchierJD_062.1	131-231	CTATGACCAGAGTGTGGACACTGCCAGTGGATATGTAGAGACCATCAAGGGCTACAAGCTGGAAGAGAAAGCCAAAACAATCTATAGCGATACAGTCCGT	86	86	X	SchierJD_062	374433;274433	SchierJD_062.1:131	probe added - also targets apoc2 (XM_686018)@100%
329	RAPGEF4a_neighbor	SchierJD_063.1	80-180	GGCGAGACAAAGACATCTGGATGAGGAGATTATGGCTCGGCGGCGATTTCGACGGAAACTCATTTTGGCGGCAAGACGCAAACGCGCGATAGAGCGACGA	85	85	X	SchierJD_063	374440;274440	SchierJD_063.1:80	probe added - also targets LOC100535508 (XM_003199169)@100%
