# Supplementary material for: Response to Nodal morphogen gradient is determined by the kinetics of target gene induction
Source: eLife. 2015 Apr 14;4:e05042. doi: 10.7554/eLife.05042 (PMC4395910; doi:10.7554/eLife.05042)
Supplement: Figure 5—source data 7. — (A) Simulated transcription rate associated with the best fit. (B) Range of transcription rates encompassing the 95% confidence intervals. (C) Simulated degradation rate associated with the best fit. (D) Range of degradation rates encompassing the 95% confidence intervals. (E) Simulated Kd associated with the best fit. (F) Range of Kd encompassing the 95% confidence intervals. (G) Simulated Hill coefficient associated with the best fit. (H) Range of Hill coefficient values encompassing the 95% confidence intervals. (I) Coefficient of determination value of the best fit. (J) Maximum mRNA levels obtained in NanoString experiments (counts). (K) Maximum range of simulated spatial expression. The predicted spatial gene expression ranges only build on the simulated response to Nodal signaling kinetics. Regulation by other pathways is not taken into account and might change the in vivo expression patterns of these genes. (L) Degree of insensitivity to cycloheximide treatment: Strong (+), mild (±) or no (−) induction by Nodal after cycloheximide. (M and N) Amplitude of FoxH1 and Smad2 associated peaks: ++high, +medium, ±low, -background levels. See text and methods for details. DOI: http://dx.doi.org/10.7554/eLife.05042.023 [file elife05042s008.xlsx]

## Sheet: Sheet1
Gene name	Tx rate (best) (a)	Tx rate (min-max) (b)	Deg. Rate (best) (c)	Deg. Rate (min-max)(d)	Kd (best)(e)	Kd (min-max)(f)	Hill coef. (best)(g)	Hill coef. (min-max)(h)	R^2 best fit (i)	Max. Exp.(j)	Range (k)	CHX Exp. (l)	FOXH1 binding (m)	Smad2 binding (n)
FOXA3	0.59	[0.58-0.75]	1e-05	[1.00e-05-5.00e-05]	5.05	[4.49-5.57]	4	[2.50-4.00]	0.97	2334.74	97.1755	+	++	++
Gadd45b	0.25	[0.13-0.35]	0.000197	[1.02e-04-1.97e-04]	7.48	[5.64-13.29]	2.2	[1.08-4.00]	0.98	558.496	77.071	+/-	++	++
acvr1b	0.33	[0.17-1.21]	1e-05	[1.00e-05-6.42e-04]	8.26	[5.08-8.26]	1.08	[1.00-4.00]	0.93	784.179	159.157	+	+	+
arg2	0.03	[0.02-0.03]	0.000154	[5.00e-05-1.54e-04]	4.38	[3.52-5.17]	1.58	[1.04-2.92]	0.98	72.3794	0	+	+	-
arl4l	0.01	[0.01-0.02]	1e-05	[1.00e-05-5.00e-05]	5.06	[4.48-7.43]	4	[2.50-4.00]	0.65	28.4219	0	+	++	+/-
bhik	0.58	[0.43-0.78]	1e-05	[1.00e-05-5.00e-05]	5.27	[4.75-5.40]	1.73	[1.19-4.00]	0.96	1910.65	151.077	+	ND	ND
bon	0.33	[0.33-0.40]	1e-05	[1.00e-05-5.00e-05]	5.14	[4.50-6.09]	4	[4.00-4.00]	0.94	1188.22	86.1811	+	+	+/-
chd	0.16	[0.14-0.53]	1e-05	[1.00e-05-5.00e-05]	5.31	[5.31-16.67]	4	[1.01-4.00]	0.88	512.366	70.469	+	++	++
dkk1	0.06	[0.01-0.16]	1e-05	[1.00e-05-5.00e-05]	6.22	[6.22-7.19]	4	[2.23-4.00]	0.49	104.306	36.085	-	++	+
draculin	0.16	[0.10-0.20]	0.000107	[6.36e-05-1.31e-04]	0.73	[0.14-1.66]	1	[1.00-2.11]	0.82	893.456	232.986	+	+	+
dusp4	0.23	[0.16-0.38]	1e-05	[1.00e-05-5.00e-05]	5.82	[5.17-7.58]	4	[2.59-4.00]	0.79	618.115	71.3785	-	+/-	++
dusp6	0.13	[0.11-0.17]	1e-05	[1.00e-05-5.00e-05]	5.8	[4.50-6.31]	4	[2.49-4.00]	0.95	472.008	60.2781	+	+	+/-
efnb2a	0.2	[0.20-1.37]	1e-05	[1.00e-05-5.00e-05]	7.17	[6.65-48.66]	4	[1.66-4.00]	0.9	610.381	54.4556	-	++	++
efnb2b	0.04	[0.02-0.08]	1e-05	[1.00e-05-5.00e-05]	6.68	[6.59-9.00]	4	[2.42-4.00]	0.68	102.203	19.8539	-	+/-	+
elovl6	0.03	[0.03-0.04]	1e-05	[1.00e-05-5.00e-05]	5.59	[4.39-6.34]	4	[3.34-4.00]	0.94	122.926	26.189	+	see pitx2	see pitx2
ets2	0.05	[0.04-0.14]	1e-05	[1.00e-05-5.00e-05]	5.75	[5.75-12.50]	4	[1.15-4.00]	0.83	139.877	34.8995	+	+	+
fgf3	0.03	[0.02-0.03]	9.29e-05	[5.00e-05-9.29e-05]	5.84	[5.06-5.84]	3.77	[1.95-4.00]	0.99	101.311	0.193373	+	++	+
fgf4	0.08	[0.05-0.08]	0.000224	[5.77e-05-2.24e-04]	6.34	[4.89-6.34]	4	[4.00-4.00]	0.95	192.357	32.9879	+	++	+/-
fgf8	0.07	[0.07-0.07]	0.000129	[8.94e-05-1.39e-04]	4.51	[3.70-5.16]	4	[2.90-4.00]	0.96	219.783	58.1686	+	+/-	+
flh	4.94	[0.71-8.29]	0.00631	[6.37e-04-1.00e-02]	2.87	[1.59-6.57]	1.12	[1.12-4.00]	0.95	690.615	198.724	+	++	++
flrt3	0.05	[0.05-0.06]	1e-05	[1.00e-05-5.02e-05]	4.85	[4.13-5.85]	4	[3.29-4.00]	0.95	177.992	47.6166	+	++	+
foxa	0.14	[0.12-0.21]	1e-05	[1.00e-05-5.00e-05]	5.54	[4.53-6.74]	4	[3.07-4.00]	0.85	438.112	65.4897	+	+/-	+/-
foxa2	0.07	[0.05-0.07]	0.000128	[5.00e-05-1.28e-04]	6	[4.57-6.15]	4	[4.00-4.00]	0.97	197.107	36.256	+/-	++	+
foxc1a	0.24	[0.02-5.84]	0.000407	[5.00e-05-7.52e-03]	20.32	[6.99-23.63]	2.3	[2.30-4.00]	1	131.032	0	+	++	+
frzb	0.02	[0.01-0.03]	1e-05	[1.00e-05-5.00e-05]	6.27	[5.50-7.76]	4	[2.44-4.00]	0.76	52.0851	0	-	+	+
fscn1	0.34	[0.28-0.65]	1e-05	[1.00e-05-5.00e-05]	5.5	[5.50-7.87]	4	[1.19-4.00]	0.95	1228.11	82.4117	+	+	+
fzd8a	0.01	[0.01-0.03]	1e-05	[1.00e-05-5.07e-05]	6.15	[4.26-9.89]	4	[2.20-4.00]	0.56	38.9774	0	+/-	+/-	+
fzd8b	0.02	[0.01-0.04]	1e-05	[1.00e-05-5.00e-05]	4.98	[4.13-7.25]	4	[2.79-4.00]	0.68	58.6956	14.8609	+	+	+
gata5	0.04	[0.03-0.08]	1e-05	[1.00e-05-5.00e-05]	6.63	[6.63-9.23]	4	[2.69-4.00]	0.77	128.949	22.5331	+	+	+/-
gsc	0.03	[0.03-0.05]	1e-05	[1.00e-05-5.00e-05]	5.37	[4.43-6.63]	4	[3.07-4.00]	0.85	99.7187	26.0283	+	+	+
irx3a	0.04	[0.02-0.09]	1e-05	[1.00e-05-5.00e-05]	6.11	[6.11-8.51]	4	[2.31-4.00]	0.67	96.1648	26.8283	+	++	+/-
ism1	0.01	[0.00-0.01]	1e-05	[1.00e-05-5.00e-05]	6.7	[5.80-6.70]	4	[1.00-4.00]	0.75	25.6601	0	+	+	+
kirrel3l	0.04	[0.03-0.07]	1e-05	[1.00e-05-5.00e-05]	6.96	[6.89-8.35]	4	[2.59-4.00]	0.87	127.683	16.6515	+/-	ND	ND
lft1	9.35	[8.29-10.00]	0.00821	[7.70e-03-9.74e-03]	7.86	[7.30-7.86]	3.11	[2.33-4.00]	0.96	996.837	79.8376	+	++	++
lft2	7.71	[7.71-10.00]	0.00458	[4.58e-03-8.62e-03]	8.17	[6.68-8.17]	2.84	[2.78-4.00]	0.89	1302.75	91.7635	+	++	++
lhx1a	0.15	[0.12-0.23]	1e-05	[1.00e-05-5.00e-05]	6.74	[6.57-7.71]	4	[2.41-4.00]	0.92	493.325	53.2942	+	++	++
ndr1	0.1	[0.07-0.10]	0.000122	[5.00e-05-1.22e-04]	6.21	[4.76-6.21]	4	[4.00-4.00]	0.98	303.921	44.941	+	++	++
ndr2	0.1	[0.08-0.28]	1e-05	[1.00e-05-5.00e-05]	5.94	[5.94-15.16]	4	[1.00-4.00]	0.92	375.625	53.7223	+	+	+
nog1	0.01	[0.00-0.03]	1e-05	[1.00e-05-5.00e-05]	6.07	[5.19-7.40]	4	[2.30-4.00]	0.49	26.8202	0	+/-	+/-	+/-
ntl	0.67	[0.59-0.94]	1e-05	[1.00e-05-5.00e-05]	4.86	[4.86-5.31]	2.46	[1.46-4.00]	0.97	2477.12	129.989	+	++	+
oep	0.26	[0.15-0.30]	1.02e-05	[1.02e-05-5.00e-05]	7.94	[4.39-7.94]	1.02	[1.00-3.98]	0.93	614.299	156.463	+/-	+	+
og9x	0.1	[0.08-0.13]	1e-05	[1.00e-05-8.04e-05]	5.78	[2.00-7.07]	4	[4.00-4.00]	0.88	303.731	54.5983	+/-	+/-	-
otx1a	0.01	[0.01-0.03]	1e-05	[1.00e-05-5.00e-05]	5.69	[4.80-7.75]	4	[2.45-4.00]	0.69	36.7769	0	+	+/-	+/-
p4ha2	0.03	[0.02-0.06]	1e-05	[1.00e-05-5.00e-05]	5.71	[5.63-8.17]	4	[2.39-4.00]	0.72	78.2059	22.3639	+/-	+	-
pcdh8	0.17	[0.12-0.29]	1e-05	[1.00e-05-5.00e-05]	6.2	[6.04-8.21]	4	[2.58-4.00]	0.81	466.167	61.0094	-	++	++
pfkfb3	0.03	[0.03-0.04]	1e-05	[1.00e-05-5.00e-05]	5.97	[4.94-6.72]	4	[3.37-4.00]	0.94	103.696	17.8573	+	+	-
pitx2a	0.54	[0.32-0.54]	0.000893	[4.63e-04-8.93e-04]	7.37	[5.36-7.37]	4	[3.60-4.00]	0.99	520.314	52.0952	+	++	++
rasgef1b	0.29	[0.12-0.51]	0.000475	[3.09e-04-9.53e-04]	7.92	[4.61-7.92]	1.07	[1.00-2.52]	0.96	314.149	108.791	++	+	+/-
sox17	0	[0.00-0.01]	2.45e-05	[2.45e-05-9.21e-04]	2.69	[1.09-7.85]	4	[3.38-4.00]	0.47	15.0671	0	+/-	-	-
sox32	0.06	[0.04-0.11]	1e-05	[1.00e-05-5.00e-05]	6.14	[5.94-8.46]	4	[2.47-4.00]	0.73	159.256	38.0972	+	+	+
tagln2	0.03	[0.03-0.04]	1e-05	[1.00e-05-2.39e-04]	2.99	[1.68-6.20]	3.5	[2.34-4.00]	0.81	140.86	51.7336	+/-	+/-	+/-
tbr1b	0.01	[0.00-0.01]	1e-05	[1.00e-05-5.00e-05]	9.33	[5.36-9.33]	1.01	[1.00-4.00]	0.44	12.5275	0	-	+	+
tbx16	0.47	[0.29-0.47]	1.04e-05	[1.04e-05-5.00e-05]	8.49	[3.23-8.49]	1	[1.00-2.22]	0.98	1331.74	186.069	+	++	++
tie1	0.02	[0.01-0.02]	0.0021	[1.27e-03-2.10e-03]	5.14	[2.52-7.58]	4	[3.28-4.00]	0.52	9.84151	0	+/-	ND	ND
tp73l	0.04	[0.03-0.06]	8.93e-05	[5.01e-05-8.93e-05]	5.73	[5.01-6.70]	2.28	[1.00-4.00]	0.93	136.644	30.3245	++	+/-	+/-
tph1b	0.04	[0.03-0.10]	1e-05	[1.00e-05-5.02e-05]	4.83	[4.83-10.14]	4	[1.00-4.00]	0.86	129.143	40.5101	+	+/-	-
wnt11	3.21	[1.12-9.98]	0.000387	[3.87e-04-6.96e-03]	42.08	[5.07-42.08]	1	[1.00-4.00]	0.95	1478.01	171.296	+	++	+
xbp1	0.03	[0.03-0.08]	1e-05	[1.00e-05-5.00e-05]	5.05	[5.05-6.11]	4	[1.00-4.00]	0.8	117.364	33.328	+/-	+	+/-
zgc:110712	0.18	[0.18-2.56]	1e-05	[1.00e-05-5.00e-05]	6.13	[6.13-92.85]	4	[1.36-4.00]	0.96	639.502	63.4183	+	+/-	-
zic2a	0.1	[0.08-0.30]	1e-05	[1.00e-05-5.00e-05]	6.07	[6.07-16.35]	4	[1.21-4.00]	0.91	321.879	50.2007	+/-	++	++
zic3	0.04	[0.02-0.04]	0.000229	[5.00e-05-2.29e-04]	6.72	[4.27-7.06]	4	[2.90-4.00]	0.69	74.0846	0	-	+/-	-
Figure 5 –table supplement 1: Nodal target genes identified in the NanoString codeset and their associated characteristics.
a Simulated transcription rate associated with the best fit. b Range of transcription rates encompassing the 95% confidence intervals. c Simulated degradation rate associated with the best fit. d Range of degradation rates encompassing the 95% confidence intervals. e Simulated Kd associated with the best fit. f Range of Kd encompassing the 95% confidence intervals. g Simulated Hill coefficient as…

## Sheet: params_good.txt
gene	TX	DEG	Kd	Hill	R^2	MaxExp	MaxD (100)	CyclohExp	FOX	Smad2
FOXA3	0.59	1e-05	5.1	4	0.97	2334.74	97.1755	+	++	++
Gadd45b	0.25	0.0002	7.5	2.2	0.98	558.496	77.071
acvr1b	0.33	1e-05	8.3	1.1	0.93	784.179	159.157	+	+	+
arg2	0.027	0.00015	4.4	1.6	0.98	72.3794	0	+	+	-
arl4l	0.011	1e-05	5.1	4	0.65	28.4219	0	+	++	+/-
bhik	0.58	1e-05	5.3	1.7	0.96	1910.65	151.077	+	ND	ND
bon	0.33	1e-05	5.1	4	0.94	1188.22	86.1811	+	+	+/-
chd	0.16	1e-05	5.3	4	0.88	512.366	70.469	+	++	++
dkk1	0.059	1e-05	6.2	4	0.49	104.306	36.085	-	++	+
draculin	0.16	0.00011	0.73	1	0.82	893.456	232.986	+	+	+
dusp4	0.23	1e-05	5.8	4	0.79	618.115	71.3785
dusp6	0.13	1e-05	5.8	4	0.95	472.008	60.2781	+	+	+/-
efnb2a	0.2	1e-05	7.2	4	0.9	610.381	54.4556	-	++	++
efnb2b	0.041	1e-05	6.7	4	0.68	102.203	19.8539	-	+/-	+
elovl6	0.034	1e-05	5.6	4	0.94	122.926	26.189	+	see pitx2
ets2	0.047	1e-05	5.7	4	0.83	139.877	34.8995	+	+	+
fgf3	0.03	9.3e-05	5.8	3.8	0.99	101.311	0.193373	+	++	+
fgf4	0.082	0.00022	6.3	4	0.95	192.357	32.9879	+	++	+/-
fgf8	0.073	0.00013	4.5	4	0.96	219.783	58.1686	+	+/-	+
flh	4.9	0.0063	2.9	1.1	0.95	690.615	198.724	+	++	++
flrt3	0.048	1e-05	4.8	4	0.95	177.992	47.6166	+	++	+
foxa	0.14	1e-05	5.5	4	0.85	438.112	65.4897	+	+/-	+/-
foxa2	0.068	0.00013	6	4	0.97	197.107	36.256	+/-	++	+
foxc1a	0.24	0.00041	20	2.3	1	131.032	0	+	++	+
frzb	0.016	1e-05	6.3	4	0.76	52.0851	0	-	+	+
fscn1	0.34	1e-05	5.5	4	0.95	1228.11	82.4117	+	+	+
fzd8a	0.014	1e-05	6.1	4	0.56	38.9774	0	+/-	+/-	+
fzd8b	0.023	1e-05	5	4	0.68	58.6956	14.8609	+	+	+
gata5	0.044	1e-05	6.6	4	0.77	128.949	22.5331	+	+	+/-
gsc	0.032	1e-05	5.4	4	0.85	99.7187	26.0283	+	+	+
irx3a	0.042	1e-05	6.1	4	0.67	96.1648	26.8283	+	++	+/-
ism1	0.0071	1e-05	6.7	4	0.75	25.6601	0	+	+	+
kirrel3l	0.041	1e-05	7	4	0.87	127.683	16.6515	+/-	ND	ND
lft1	9.3	0.0082	7.9	3.1	0.96	996.837	79.8376	+	++	++
lft2	7.7	0.0046	8.2	2.8	0.89	1302.75	91.7635	+	++	++
lhx1a	0.15	1e-05	6.7	4	0.92	493.325	53.2942	+	++	++
ndr1	0.1	0.00012	6.2	4	0.98	303.921	44.941	+	++	++
ndr2	0.1	1e-05	5.9	4	0.92	375.625	53.7223	+	+	+
nog1	0.013	1e-05	6.1	4	0.49	26.8202	0	+/-	+/-	+/-
ntl2	1.03	0.00018	5.5	2.5	0.92
ntl	0.67	1e-05	4.9	2.5	0.97	2477.12	129.989	+	++	+
oep	0.26	1e-05	7.9	1	0.93	614.299	156.463	+/-	+	+
og9x	0.099	1e-05	5.8	4	0.88	303.731	54.5983	+/-	+/-	-
otx1a	0.014	1e-05	5.7	4	0.69	36.7769	0	+	+/-	+/-
p4ha2	0.032	1e-05	5.7	4	0.72	78.2059	22.3639	+/-	+	-
pcdh8	0.17	1e-05	6.2	4	0.81	466.167	61.0094	-	++	++
pfkfb3	0.031	1e-05	6	4	0.94	103.696	17.8573
pitx2a	0.54	0.00089	7.4	4	0.99	520.314	52.0952	+	++	++
rasgef1b	0.29	0.00048	7.9	1.1	0.96	314.149	108.791	++	+	+/-
sox17	0.0016	2.5e-05	2.7	4	0.47	15.0671	0
sox32	0.061	1e-05	6.1	4	0.73	159.256	38.0972	+	+	+
tagln2	0.025	1e-05	3	3.5	0.81	140.86	51.7336
tbr1b	0.0083	1e-05	9.3	1	0.44	12.5275	0	-	+	+
tbx16	0.47	1e-05	8.5	1	0.98	1331.74	186.069	+	++	++
tie1	0.016	0.0021	5.1	4	0.52	9.84151	0
tp73l	0.044	8.9e-05	5.7	2.3	0.93	136.644	30.3245	++	+/-	+/-
tph1b	0.039	1e-05	4.8	4	0.86	129.143	40.5101	+	+/-	-
wnt11	3.2	0.00039	42	1	0.95	1478.01	171.296	+	++	+
xbp1	0.035	1e-05	5	4	0.8	117.364	33.328	+/-	+	+/-
zgc:110712	0.18	1e-05	6.1	4	0.96	639.502	63.4183	+	+/-	-
zic2a	0.095	1e-05	6.1	4	0.91	321.879	50.2007
zic3	0.038	0.00023	6.7	4	0.69	74.0846	0	-	+/-	-
